# Supplementary material for: Failure Modes of a Reticulated Dome in a Small Airplane Crash
Source: Hindawi journal article supplement (doi:10.1155/2019/5025637), 2019-01-01
Supplement: f1 [file 5025637.f1.caj]

# 核电站在大型商用客机撞击下损伤破坏研究进展

方 秦<sup>1</sup>, 吴 昊<sup>2</sup>, 张 涛<sup>3</sup>

(1. 陆军工程大学, 江苏南京 210007; 2. 同济大学 结构工程与防灾研究所, 上海 200092;

3. 军事科学院 国防工程研究院, 河南洛阳 471023)

**摘要:**2001 年 9·11 事件后, 美国核能管理委员会、核能研究院和能源部以及我国核安全局相继出台相关规范, 明确规定核电站设计必须考虑大型商用客机的意外和恐怖性撞击作用。从飞机机身的整体撞击效应、引擎局部撞击效应以及核岛厂房结构振动 3 方面, 回顾了核电站重要基础设施在飞机撞击下损伤破坏的理论模型、原型和缩尺试验以及数值仿真研究等工作进展, 对课题组近年来在该领域的研究工作进行了简要介绍, 包括 4 种典型飞机 (F4 战斗机、空客 A320、A380 和新舟 MA600) 和 4 类核岛设施 (预应力钢筋混凝土屏蔽厂房、普通钢筋混凝土屏蔽与附属厂房、钢板混凝土屏蔽与附属厂房、普通钢筋混凝土大型冷却塔) 的精细化有限元模型及其撞击全过程的数值仿真分析。此外, 介绍了引擎撞击普通钢筋混凝土和超高性能混凝土靶板的缩尺试验和数值模拟分析工作, 以及引擎撞击局部效应的计算方法。最后, 指出了该领域已有研究在撞击力计算、整体响应、局部破坏、振动效应和多灾害作用方面的不足和进一步研究方向的建议。

**关键词:**核电站; 大型商用客机; 撞击; 损伤破坏; 研究进展

**中图分类号:**TM623 O313.4 TU312 **文献标志码:**A

## State of the art for damage and failure of nuclear power plant under large commercial aircraft impact

FANG Qin<sup>1</sup>, WU Hao<sup>2</sup>, ZHANG Tao<sup>3</sup>

(1. Army Engineering University of PLA, Nanjing 210007, China;

2. Structural Engineering and Disaster Prevention Research Institute, Tongji University, Shanghai 200092, China;

3. National Defense Engineering Institute, Academy of Military Science of PLA, Luoyang 471023, China)

**Abstract:** After the september 11, 2001 event, a series of regulations was issued by USA Nuclear Regulatory Commission, Nuclear Energy Institute, Department of Energy as well as National Nuclear Safety Administration of China. It is specified that the newly built nuclear power plant (NPP) should be designed to resist the accidental impact and terrorist attack by large commercial aircraft. In the present paper, from the three aspects, e. g., integral responses of NPP under aircraft fuselage impact, local responses of NPP under aircraft engine impact, structural vibrations of nuclear island buildings, the state of the art in the theoretical model, prototype and reduced scale modelling test, numerical simulations for the damage and failure of nuclear island infrastructures under large commercial aircraft impact were reviewed comprehensively. Furthermore, our recent work in the above areas were briefly introduced, inducing the fine finite element models of four typical aircrafts (F4 fighter, Airbus A320, A380, MA600), four NPP infrastructures (prestressed RC NPP containment, RC NPP containment and auxiliary buildings, steel concrete NPP containment and auxiliary buildings, RC large-scale cooling tower), as well as the reproductions of the whole collision processes based on numerical simulations. Besides, the reduced scale engine impact test on normal RC and ultra-high performance concrete target plates, the corresponding numerical simulations, as well as the calculation approach for the terminal ballistic parameters of engine were introduced. Finally, the shortages in the existing work such as calculation of impact force, integral response, local damage, vibration effect and multi-hazard impact, and the future research recommendations were pointed out.

**Keywords:** nuclear power plant; large commercial aircraft; impact; damage and failure; state of the art

**基金项目:**国家自然科学基金项目(51878507)。

**作者简介:**方秦, 出生于 1962 年, 男, 工学博士, 教授, 主要从事冲击爆炸效应与工程防护领域的研究工作。E-mail: fangqinjs@139.com

**收稿日期:**2018 年 8 月

## 0 引言

20 世纪中叶以来,核能一直是经济发达国家和地区重点发展的新能源。截止 2019 年 1 月 18 日,全世界正在运营的核电机组共有 453 台(中国 50 台),正在建设的有 55 台(中国 13 台),我国核能总净装机容量已占世界核能总净装机容量的约 12%,成为全球在建核电项目最多、在建装机容量最大的国家(<http://pris.iaea.org/PRIS/home.apx>)。然而,核电站核燃料一旦泄露会给人类带来巨大的灾难。如 1986 年乌克兰切尔诺贝利核电站和 2011 年日本福岛核电站分别在意外爆炸、地震与海啸的作用下导致大量放射性物质泄漏,除了巨大的经济损失外,也给生态环境造成了不可估量和难以挽回的永久性破坏。随着核岛结构设计方法以及相关设施设备的不断完善,由核电站内因导致的严重泄漏事故已基本可控。相比之下,强烈的外部冲击、爆炸作用,由于其较大的不可控和不确定性,更易直接或间接地引发放射性物质的泄漏。目前,对核电站威胁较大的外部事故主要有地震和海啸、剧烈气流(龙卷风/飓风)、飞机撞击和恐怖爆炸袭击等。

随着世界范围内地区冲突和恐怖事件的不断加剧,以及核电站破坏后放射性燃料泄露导致的灾难性后果,使得核电站成为恐怖袭击的主要目标。如 1972 年 11 月,三名恐怖分子挟持了往返伯明翰和孟菲斯的美国客机,并威胁如果不飞到古巴的哈瓦那,就胁迫飞机撞击美国原子能协会位于田纳西州橡树岭的核设施<sup>[1]</sup>。2004 年 8 月 24 日,俄罗斯坠毁两架被车臣恐怖分子挟持的客机,事后分析表明,其原定任务是撞击位于博恰罗沃的普京总统官邸以及新沃罗涅日斯基和伏尔加顿斯克两座核电站。特别是在 2001 年 9·11 事件中,恐怖分子劫持了四架美国民航客机,胁迫其中三架分别撞击了世贸大厦和五角大楼,另一架飞机(B757)坠毁于宾夕法尼亚州,事后分析表明,其袭击目标很可能是位于宾夕法尼亚州南部三英里岛的核电站<sup>[1]</sup>。

9·11 事件之前,对于核电站结构设计,仅需考虑轻型飞机,如质量约 20 t、翼展约 10 m 的 F4“鬼怪式”战斗机撞击作用,而对于中、大型商用客机,只要求进行安全风险评估<sup>[2]</sup>。而 9·11 事件之后,法国和德国相关专家研究认为,已建成的核电站最多只能抵御 5 架小型飞机的低速撞击,而无法抵御类似于空客(Airbus)和波音(Boeing)等公司生产的中、大型商用客机的撞击。经过 8 年的反复研究,2009 年,美国联邦法规制定的《Aircraft impact assessment》<sup>[3]</sup>与核能管理委员会修订的《Consideration of aircraft

impacts for new nuclear power reactors》<sup>[4]</sup>正式颁布,要求美国新建核电站必须能够抵御大型商用飞机的恶意撞击。此外,美国能源部、核能研究院和核能管理委员会等部门也相继颁布了分析指南<sup>[2,5-6]</sup>。我国核安全局也于 2016 年批准并颁布了 HAF 102—2016《核动力厂设计安全规定》<sup>[7]</sup>,明确规定我国核电站建造要考虑商用飞机的恶意撞击。

然而,上述法规、规范和指南等在大型商用客机撞击核电站分析方面所提供的信息有限,仅给出了总体指导意见,并没有明确具体的分析方法以及结构和设备的损伤破坏与振动评估标准等内容。随着全球民航业的迅猛发展,中、大型商用客机的数量也在迅速增加,目前在役的已经超过 30 000 架([www.flightradar24.com/data/airlines](http://www.flightradar24.com/data/airlines)),一旦偶然性或恐怖性撞击核岛设施,将会带来无法估量的严重后果。因此,核电站安全的客观需求,以及相关研究工作的相对滞后等现状都要求深入、系统开展核电站抗大型商用客机撞击的基础理论和工程应用研究,提出大型商用客机撞击作用下核电站重要设施结构损伤破坏、厂房结构和内部设备振动响应的分析与评估方法,对 HAF 102—2016 提供基础理论和技术支撑。为此,本文主要介绍飞机撞击对核电站设施的动态响应和损伤破坏研究工作进展。

## 1 国内外研究现状

对于核电站在大型商用客机撞击下损伤破坏的研究, Jiang 等<sup>[8]</sup>、刘晶波等<sup>[9]</sup>、温丽晶等<sup>[10]</sup>和 Cheng 等<sup>[11]</sup>先后对飞机撞击核电站安全壳的分析方法进行了综述性介绍,包括飞机撞击荷载、撞击分析方法及其试验验证、核岛选址、结构振动和火灾响应等方面。对于飞机撞击分析, Kœchlin 等<sup>[12-13]</sup>基于材料强度和撞击速度提出了利用压屈力和惯性力定量划分软/硬撞击的分类方法。根据此方法可知,机身撞击属于软撞击,而引擎撞击则属于硬撞击。因此,分别从飞机机身撞击的整体效应、引擎撞击的局部效应以及核岛厂房结构振动与可靠性评估等三方面对国内外在理论模型、试验研究和数值模拟的现状进行评述。

### 1.1 飞机机身撞击的整体效应

#### 1.1.1 理论模型

对于飞机撞击力计算,如图 1 所示, Riera<sup>[14]</sup>最早提出将飞机撞击刚性平面的总撞击力分为压屈力和惯性力两部分,表达式为

$$F(t) = P[x(\dot{t})] + \mu[x(\dot{t})]V^2(t) \quad (1)$$

式中:  $F(t)$  为  $t$  时刻的总撞击力;  $P[x(\dot{t})]$  为  $t$  时刻在压屈面上对应的飞机结构沿轴线方向的屈曲力;

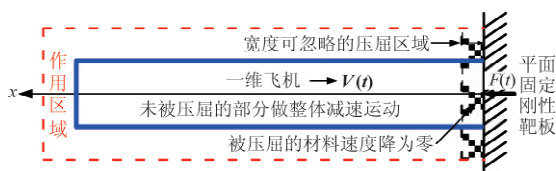

图1 Riera 撞击力模型

Fig.1 Riera impact force model

$\mu[x(t)]$  为  $t$  时刻在压屈面上对应的飞机质量沿轴线分布的线密度;  $V(t)$  为  $t$  时刻飞机机身未被压屈部分的速度;  $x(t)$  为从撞击开始到  $t$  时刻之间飞机自头部算起的飞机压屈总长度。

$P[x(t)]$  和  $\mu[x(t)]$  均为压屈长度  $x$  的函数, 需要通过实际测量或预先假定得到, 而压屈长度又是时间  $t$  的函数, 设定初始撞击速度  $V(t=0)$ , 通过迭代计算可以得到总撞击力时程曲线。

韩鹏飞等<sup>[15]</sup> 梳理和评价了现有的压屈力计算方法, 给出了更适宜于飞机撞击分析的压屈力计算公式, 并进一步讨论了压屈力对撞击荷载的影响。张涛等<sup>[16]</sup> 给出了 Riera 模型的具体迭代方法, 并对飞机的压屈力、质量分布和撞击速度进行了参数分析, 结果表明, 压屈力占总撞击力的比例较小(约 10%), 撞击力基本随质量分布同比例改变, 而撞击速度的变化对结果最为敏感。Horuyik<sup>[17]</sup> 基于能量守恒定律, 对 Riera 模型的惯性力项引入了小于 1 的折减系数, 以考虑飞机撞击过程中因撞击碎片飞散所引起的质量和能量的损失对撞击力的影响, 但是由于缺乏试验数据的支撑而没有确定该系数的具体值。Riera 模型假设接触面上有一个宽度可忽略的压屈区域且被压屈材料的速度直接降为零, 而 Bahar 等<sup>[18]</sup> 认为该速度存在连续变化的梯度分布, 并提出惯性力项的折减系数为 0.5。Kar<sup>[19]</sup> 认为在飞机撞击靶板的接触面上会发生质量堆积, 因此需要对惯性力项引入折减系数, 然而没有确定该系数的具体值。之后, Riera<sup>[20]</sup> 对惯性力折减系数进行了总结评估, 认为文献[18]中的推导结果应该是撞击力的下限, 但是也未能给出该系数的具体值。为了确定该折减系数的具体值, Sugano 等<sup>[21]</sup> 开展了原型 F4 战斗机撞击混凝土平板的试验, 基于试验结果确定该折减系数为 0.9, 并在此后的相关分析中得到了广泛的应用。由于 Riera 模型仅适用平面靶板, 而核电站屏蔽厂房(安全壳)通常为圆柱形筒身, 张超<sup>[22]</sup> 基于 Riera 模型研究了飞机撞击力计算方法, 通过增加飞机碰撞混凝土靶时飞机前端部分与靶板之间存在的破损区对 Riera 模型进行了修正。

除了 Riera 撞击力计算模型, 其他学者还提出了不同的飞机撞击力计算方法, 但由于太过复杂并未

得到广泛应用。如, Dritler 等<sup>[23]</sup> 基于差分方法, 将飞机沿轴线方向划分为多个小单元, 考虑材料弹塑性变形来计算飞机的撞击力, 但是飞机质量的离散化导致了撞击力的不连续。Dritler 等<sup>[24]</sup> 进一步对飞机引擎的撞击力以及 F4 战斗机撞击刚性墙的作用力进行了参数影响分析。结果表明撞击力对接触面积、飞机材料的极限强度和应力应变曲线等参数的变化不敏感。Wolf 等<sup>[25]</sup> 提出了更为复杂的一维团聚质量动态弹塑性模型, 将飞机用多个质量点代替, 质量点之间通过弹簧进行连接, 将撞击力分为弹簧的压缩力和质量点的惯性力。Zorn 等<sup>[26]</sup> 建立了使用轴向和旋转弹簧连接的离散质量块模型, 对垂直和倾斜撞击下的飞机撞击力进行了分析。

### 1.1.2 试验研究

1993 年日本 Kobori 研究所和美国 Sandia 国家实验室联合开展了一次 F4 原型战斗机撞击钢筋混凝土(RC)厚板的试验<sup>[21, 27-28]</sup>, 撞击过程和最终靶板破坏<sup>[21]</sup> 如图 2 所示。试验测量得到了 F4 飞机冲击平面靶板的撞击力时程曲线, 通过与 Riera 模型计算结果进行对比, 验证了 Riera 模型的可行性, 并确定 Riera 模型中惯性力折减系数为 0.9。

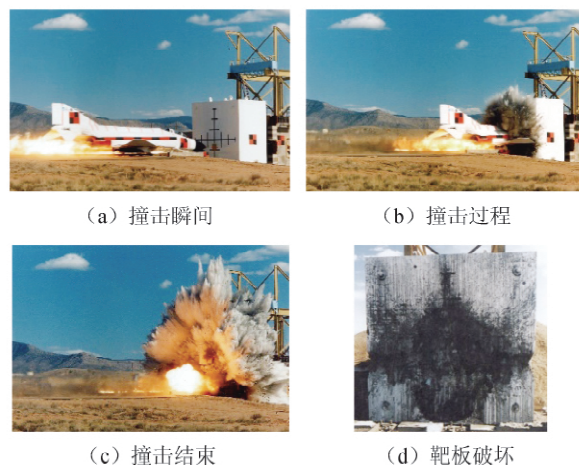

图2 F4 飞机撞击过程及 RC 靶板的正面破坏

Fig.2 Impact process of F4 fighter and front failure of RC target

为了进一步研究飞机的撞击力, 我国环境保护部核辐射安全中心和北京理工大学联合进行了三架缩尺飞机模型撞击钢筋混凝土平面靶板的试验<sup>[29]</sup>。飞机模型的长度分别为 2.2 ~ 3.8 m, 质量分别为 39 ~ 105 kg, 撞击速度均约为 200 m/s。飞机撞击过程以及撞击后飞机与靶板的破坏<sup>[29]</sup> 如图 3 所示。基于三组撞击力和冲量的数据结果, 对比得出 Riera 函数的折减系数范围为 0.8 ~ 1.0, 与上述 F4 原型战斗机撞击 RC 厚板试验<sup>[21, 27-28]</sup> 结论相近。

在等效飞机模型撞击试验方面, 日本 Kobori 研

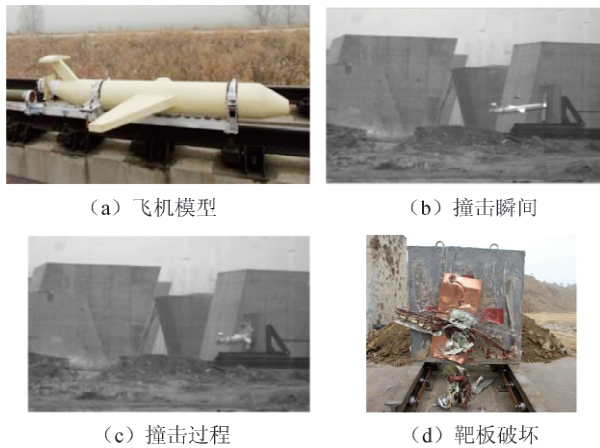

图3 缩尺飞机模型撞击过程及飞机与靶板的正面破坏

Fig.3 Impact process of aircraft model and damage of model and target

究中心进行了开创性研究工作。其中 Tsubota 等<sup>[30]</sup>开展了 1/7.5 等效缩尺 F4 飞机模型撞击双层 RC 靶板的试验(撞击速度为 142 ~ 149 m/s),主要考察了双层靶板的损伤破坏和抗冲击能力。Mizuno 等<sup>[31]</sup>开展了等效缩尺 F4 飞机模型撞击两种钢板混凝土(SC)靶板(全钢板混凝土,即混凝土两侧都用钢板包裹,无配筋;半钢板混凝土,即混凝土背面用钢板包裹,正面配置钢筋)试验,飞机模型与文献[30]中的相同。结果表明,SC 靶板的包裹钢板(特别是后覆钢板)可以有效抑制混凝土碎片的飞溅。Anderson 等<sup>[32]</sup>开展了变形弹体冲击钢筋混凝土靶板的试验,所采用的弹体为 MRCA 飞机的 1/25 缩尺模型,结果表明,受弯钢筋对靶板响应的影响较小,2 m 厚原型安全壳可以抵御一架 MRCA 飞机的撞击,1.4 m 厚处于临界贯穿状态,1 m 厚则会被贯穿。

为了给核电站抵抗战斗机撞击的安全性能评估提供试验依据,HOCHTIF 和西门子公司在德国 Meppen 军事基地联合开展了迄今为止规模最大的可变形弹体撞击 RC 靶板的试验<sup>[33-35]</sup>。试验中弹体为空心低碳钢管,总质量为 940 ~ 1 060 kg,弹体长度为 5.99 ~ 7.99 m,初速度范围为 170 ~ 250 m/s。为研究 RC 结构在各类软/硬弹体撞击下的破坏模式和动态响应,芬兰技术研究中心 VTT 联合 12 个国家核安全研究机构启动了 IMPACT 研究项目<sup>[36-45]</sup>。通过开展可变形铝/钢弹体(部分弹体充水模拟燃油)冲击 RC 靶板试验,对其弯曲和冲切破坏模式以及配筋方式的影响进行了系统的试验研究。此外,还开展了 RC 结构在可变形弹体撞击下的振动与阻尼特性的试验研究。欧洲经合组织核能机构与德国核辐射防护研究所等组织发起了 IRIS 项目<sup>[46-55]</sup>,共有 11 个国家的

核研究机构参与,通过对比不同的分析程序、模拟方法和计算结果,确定用于评估核电站在外部撞击作用下结构破坏和振动效应的最优分析方法。这些系统的研究为核电设施抗飞机撞击的安全评估与分析提供了试验数据支持。

在国内,孔建伟等<sup>[56]</sup>以 CPR1000 核安全壳为研究对象,设计并建造了 1/20 的混凝土相似材料模型,分别采用 16 kg 的混凝土块和 140 kg 的铁制圆筒模拟 13 t 的 MA600 客机和 40 t 的 B737-800 客机。试验表明:核电厂安全壳遭受小型飞机撞击作用时会出现局部冲剪破坏,筒体出现孔洞;在遭受大型商用飞机第 1 次撞击作用后会出现大量的宏观裂纹,撞击局部出现孔洞,但安全壳并没有发生整体性的破坏和倒塌现象,而遭受第 2 次撞击后,安全壳则发生倒塌破坏。

### 1.1.3 数值模拟

目前,针对飞机撞击核安全壳的数值模拟方法主要有两种:一种是弹-靶接触分析方法(耦合方法),即同时建立安全壳和飞机的有限元模型,对撞击全过程进行模拟;另一种是撞击力时程分析方法(非耦合方法),只建立安全壳的有限元模型,通过将飞机撞击荷载时程曲线施加到预设的核安全壳撞击面积上进行分析。以下分别从飞机撞击平面靶板、核电站屏蔽厂房和附属厂房等三方面,对飞机撞击核安全壳的数值模拟研究进行综述。

1) 飞机撞击平面靶板的数值模拟。Itoh 等<sup>[57]</sup>建立了简化的 B747 飞机模型,并模拟了 300 km/h 的速度撞击 3 m 厚的混凝土板,结果表明混凝土板没有遭到严重破坏。Itoh 等<sup>[58]</sup>进一步对 F4 战斗机撞击试验进行了数值模拟,再现了试验观测到的飞机破坏和引擎侵入靶板的现象,同时认为必须进一步提高飞机模型的精细程度以增加模拟的准确性。Martin 等<sup>[59]</sup>对 Meppen 试验<sup>[33]</sup>的仿真分析结果表明,显式求解程序可以较好地模拟试验现象。Sadiq 等<sup>[60]</sup>对 Tsubota 等<sup>[30]</sup>和 Mizuno 等<sup>[31]</sup>的 1/7.5 等效 F4 飞机模型撞击双层钢筋混凝土(RC)和单层钢板混凝土(SC)靶板的试验进行了数值模拟,对比了不同混凝土材料模型的适用性,结果表明 Winfrith 模型较 CSC 模型可以更好地再现该试验。Thai 等<sup>[61]</sup>对 IRIS 项目的试验进行了数值模拟,并进一步开展了刚性弹撞击 RC 靶板的参数分析。李小军等<sup>[62]</sup>对 Tsubota 等<sup>[30]</sup>试验进行了数值模拟,在同一接触算法和失效准则下,对比分析了 LS-DYNA 程序中 4 种混凝土材料模型对撞击试验模拟结果的影响,结果表明 4 种模型均能较好预测结构的局部破坏效应,但对于破坏面积及残余速度等, MAT\_072R3 和 MAT\_084 模型的计算结果与试验较接近, MAT\_111 模型次之,而



MAT\_159 模型差异较大。Heckötter 等<sup>[63]</sup>对 IMPACT 项目中的可变形弹和刚性弹撞击试验进行了数值模拟,分析结果与试验数据吻合良好。Lee 等<sup>[64]</sup>对 Mizuno 等<sup>[31]</sup>的 1/7.5 飞机模型撞击 SC 靶板的试验进行了数值模拟,通过参数化分析对比了 SC 与 RC 靶板抗刚性弹撞击能力,结果表明 SC 靶板抗撞击性能更优。

2) 飞机撞击核电站屏蔽厂房的非耦合数值模拟。左家红<sup>[65]</sup>针对军用训练机意外坠毁撞击秦山核电厂安全壳进行了非耦合分析,结果表明壳体结构满足安全性要求。基于 B707-320 和 A300B4-200 飞机的撞击力时程曲线,Kukreja<sup>[66]</sup>对印度 500MWe PHWR 核电站双层安全壳进行了简化的非耦合数值模拟分析,结果表明该安全壳有足够的承载能力可以抵御上述飞机的撞击。王晓雯等<sup>[67]</sup>通过建立简化的安全壳模型(包括混凝土、预应力钢束和钢衬),分别选用美国核能研究院(NEI)规范中规定的小型商用飞机的撞击力荷载垂直作用于穹顶中央有效撞击范围进行了非耦合分析,结果表明,安全壳的结构设计应确保其在小型飞机撞击下的结构弹性完整性,在商用飞机撞击下的结构不发生整体性的破坏,且能保证其密封性能及核电厂的整体安全性。Frano 等<sup>[68]</sup>采用非耦合方法,将 B747 和 F4 飞机的撞击荷载时程曲线直接施加于简化的安全壳有限元模型进行分析,结果表明非撞击区域的安全壳结构整体稳定性可以得到保证,而小于 1 m 厚度的安全壳结构在大型商用客机撞击中偏于危险。Iqbal 等<sup>[69]</sup>和 Sadique 等<sup>[70]</sup>建立了 1.2 m 厚 RC 安全壳有限元模型,采用 ABAQUS 软件分别将 5 种飞机(B747-400、B767-400、A320、B707-320 和 F4)的撞击荷载时程曲线直接施加于安全壳(非耦合方法),分析了结构的动力响应,结果表明不同机型对撞击结果有一定影响。李亮等<sup>[71]</sup>将 B707-320 飞机的撞击力加载于安全壳进行了非耦合分析,结果表明壳体可以抵御该飞机的撞击。Iqbal 等<sup>[72]</sup>采用非耦合方法将 F4、B707-320 和 A320 飞机的撞击力时程曲线直接作用于安全壳结构的 4 个不同位置(筒体中部、筒体和穹顶交接处、穹顶中部和顶部),结果表明上述位置中,筒体中部最为危险,且三种飞机中 F4 战斗机撞击造成的破坏最严重。朱秀云等<sup>[73]</sup>建立了简化的 SC 安全壳模型,通过非耦合撞击分析,认为即使在撞击安全壳筒身最不利位置,B707-320 商用飞机破坏效果仍比较小,且增大钢板的厚度能够有效减小冲击作用下的结构响应。Rouzaud 等<sup>[74]</sup>采用非耦合方法对飞机撞击安全壳的动力响应进行参数分析,考虑了加载面积、混凝土抗压强度、钢筋配筋率和结构壁厚等因素,结果表明很难确定不同因素与破坏结果之

间的直接关系。Andonov 等<sup>[75]</sup>建立了预应力 RC 安全壳,采用非耦合方法对安全壳在 B737、B767 和 B747 三种飞机撞击下的易损性进行了分析,基于撞击力峰值、冲击压力峰值和撞击区域动量,得到了易损性曲线。李亮等<sup>[76]</sup>建立了简化的安全壳有限元模型,将小型和大型商用飞机恶意撞击安全壳的等效荷载曲线施加于结构上进行了非耦合的对比分析,结果表明外壳整体结构均没有发生较大破坏,可以确保安全壳的整体密封性。

3) 飞机撞击核电站屏蔽厂房的耦合数值模拟。徐征宇<sup>[77]</sup>建立了简化的 B737 飞机和 AP1000 安全壳有限元模型,通过耦合分析认为上述撞击不会引起安全壳的贯穿破坏。郑文凯<sup>[78]</sup>和刘晶波等<sup>[79]</sup>建立了 B767-200ER 飞机和安全壳有限元模型,基于引擎撞击 RC 板试验,验证了材料本构模型和相应参数,分析了大型商用飞机撞击核电站屏蔽厂房的荷载时程,以及屏蔽厂房结构变形特点和结构刚度对撞击力的影响。汤胜文<sup>[80]</sup>建立了简化的 B757 飞机和安全壳有限元模型,采用耦合方法分析了钢筋和撞击位置的影响。周妙莹<sup>[81]</sup>建立了简化的 AP1000 安全壳和飞射物有限元模型,对撞击作用下的安全壳失效模式和破坏机理进行了分析。程书剑等<sup>[82-83]</sup>建立了简化的飞机(质量 110 t,速度 100 m/s)和 AP1000 安全壳有限元模型,通过耦合撞击分析,认为安全壳最大变形没有超过内外壳之间的距离,且不会有混凝土碎块撞击到内层钢制壳体。林丽等<sup>[84]</sup>和 Lu 等<sup>[85]</sup>建立了 3 种不同精细程度的 B767-200ER 飞机和 SC 安全壳有限元模型,分析了不同飞机结构、靶体刚度和安全壳形状对撞击荷载和安全壳破坏的影响。结果表明随着模型精细度的降低,壳体的损伤程度越小,为了更真实地反映撞击过程和破坏结果,应该采用精细化的飞机有限元模型。吴婧姝等<sup>[86]</sup>建立了 CAP1400 安全壳及附属厂房有限元模型,通过现场三维激光扫描技术建立了 A340-300 飞机模型,进一步基于数值模拟分析了撞击速度、高度、角度和混凝土力学性能参数对安全壳破坏程度的影响。刘晶波等<sup>[87]</sup>建立了 B767 飞机和 SC 安全壳有限元模型,通过耦合撞击分析,认为飞机轴向网格尺寸对撞击力影响较大,撞击速度对撞击作用时间影响较小,而对结构位移影响很大。Jeon 等<sup>[88]</sup>为研究纤维增强混凝土在核电站安全壳抵御飞机撞击中的加强作用,建立了简化的 B767 飞机和韩国 OPR1000 安全壳有限元模型(无钢筋),耦合撞击分析结果表明钢纤维和聚酰胺纤维增强混凝土抗撞性能明显优于素混凝土。Lee 等<sup>[89]</sup>建立了简化的质量为 420 t 的 B747 大型商用飞机和壁厚为 1.22 m 的预应力安全壳有限元模型,根据 Riera 模型确定了飞机材料的失效标

准,并在此基础上,对撞击速度、靶体形状、预应力大小、撞击位置和角度进行了参数影响分析。本课题组<sup>[90-95]</sup>分别建立了新舟 MA600 和 A320 飞机,以及预应力钢束 RC 安全壳有限元模型,采用 SPH 单元模拟飞机燃油,分别进行了耦合与非耦合的数值模拟分析,结果表明非耦合方法不能反映安全壳真实的动力响应和损伤破坏。

4) 飞机撞击核电站附属厂房的数值模拟。Arros 等<sup>[96]</sup>建立了简化的 B747 商用飞机和假定的附属厂房有限元模型,对比了耦合撞击分析和利用 Riera 模型直接施加荷载的非耦合分析,结果表明,耦合分析中结构响应会产生更高频的振动,而非耦合分析结果对于加载面积和作用时间等人为确定的因素较为敏感。Dundulis 等<sup>[97]</sup>对 Ignalina 核电站中用于放置事故定位系统 ALS 的建筑结构在军用飞机撞击下的动力响应进行了仿真分析,采用了非耦合方法对结构完整性进行了评估,其中引擎撞击局部破坏采用了经验公式,结果表明该结构不会被贯穿且钢筋不会失效。Thai 等<sup>[98]</sup>对 B767-400 飞机撞击假定的附属厂房进行了耦合撞击分析,并参考 Riera 模型的计算结果简要对比了其模拟的飞机撞击力(趋势相似),此外基于 IRIS 项目试验分析了配筋率对结构破坏的影响,结果表明钢筋对于减少局部破坏和增加结构吸能能力有显著影响。Li 等<sup>[99]</sup>对汽车撞击、B747-400 飞机撞击(耦合方法)、局部爆炸和武器打击等极端荷载作用下核电站超高冷却塔动态响应进行了数值模拟,结果表明飞机撞击会对冷却塔造成局部贯穿破坏并且结构会在重力作用下发生倒塌。Thai 等<sup>[100]</sup>进一步采用同样的飞机模型、材料模型和验证方法,对韩国 KSNP 核电站附属厂房进行了耦合撞击分析。Shin 等<sup>[101]</sup>分别采用耦合与非耦合方法对附属厂房在商用飞机撞击下的损伤破坏和振动特性进行了分析,其中飞机燃油分别采用附加质量和 smoothed particle hydrodynamic( SPH) 两种方法进行模拟,耦合分析得到的撞击荷载用于非耦合模拟加载。Frano 等<sup>[102]</sup>采用非耦合方法将 B747 和 F4 飞机的撞击力直接加载于简化的乏燃料池厂房墙面上,并采用 MSC. MARC 软件进行了温度分布的分析。

随着计算机性能的快速提高和仿真软件的不断成熟,飞机撞击核岛设施的研究更多地采用了数值模拟方法且有限元模型越来越趋于精细化。非耦合方法虽然不需要建立飞机的有限元模型且计算效率较高,但是与真实的撞击过程有明显不同且存在荷载曲线和加载面积如何确定以及撞击荷载平均化等问题,导致结构的响应和破坏相对于采用耦合方法时较小;耦合方法虽然需要建立精细的飞机模型,但

是可以更真实地实现不同的撞击工况,得到的结果更为可靠。为了更好地采用数值模拟方法研究核电站结构在飞机撞击下的动力响应和损伤破坏,应当建立尽可能精细的飞机和安全壳有限元模型,并基于相关理论和试验先对模型的合理性进行验证,然后采用耦合方法对多种撞击工况的全过程进行系统详细的仿真模拟与分析。

## 1.2 引擎撞击的局部效应

与上述飞机机身撞击混凝土结构不同,飞机引擎撞击则属于硬撞击,混凝土结构会产生侵彻、震塌和贯穿等局部破坏现象。虽然武器(如钻地弹)冲击混凝土类结构的研究已取得了丰富的成果<sup>[103]</sup>,但是钻地弹的内部结构和冲击速度等,与飞机引擎有较大区别,在中低速冲击时弹体基本不变形,而引擎撞击则会发生严重的屈曲变形破坏,因此,已有的刚性弹体冲击效应研究成果能否应用于引擎撞击有待研究。

### 1.2.1 试验研究

针对引擎撞击混凝土结构的局部破坏效应,日本的小堀铎二研究所、中央电力研究所和美国的 Sandia 国家实验室在 1993 年联合开展了一系列 F4 战斗机 GE-J79 引擎的原型和缩尺撞击试验<sup>[104-109]</sup>。共采用了 83 个原型以及 1/1、1/2.5 和 1/7.5 等 3 种比例尺的等效缩尺模型,分别考虑了刚性和可变形弹体<sup>[104-109]</sup>(图 4),研究了撞击速度(83 ~ 252 m/s)、靶板厚度(60 ~ 1 600 mm)、钢筋配筋率(0.2% ~ 0.6%)和混凝土强度(23.5、35.3 MPa)对靶板局部破坏(侵彻、震塌和贯穿)的影响。图 5 给出了原型引擎的撞击过程<sup>[104-109]</sup>。结果表明:引擎的简化缩尺方法以及物理相似率的应用较为合适,且简化模型的刚度比真实引擎刚度更大,因此结果更偏于保守;对于可变形引擎对 RC 靶板的不同局部破坏模式,可以在刚性弹侵彻贯穿公式的基础上引入折减系数进行预测,配筋率对靶板局部破坏影响很小,后覆钢板可有效减少混凝土碎片的飞溅。

Riedel 等<sup>[110]</sup>开展了 1/10 缩尺引擎撞击超高性能混凝土( UHPC) 靶板的试验。其中引擎模型的简化方法来自于 Sugano 等<sup>[104-105]</sup>,直径为 76 mm,质量为 1.5 kg,混凝土强度为 172.1 ~ 196.0 MPa,钢纤维体积含量为 1%,靶板内有配筋(直径 5.5 mm,间距 50 mm),撞击速度 194.7 ~ 368.6 m/s。试验得到靶板不同的局部响应破坏模式,认为 UHP-SFRC 具有较普通混凝土更优异的防护性能。Zhang 等<sup>[111-113]</sup>制作了 1/10 比例的 GE-J79 引擎缩尺模型,对普通 RC 和 UHP-SFRC 靶板分别开展了冲击速度为 94 ~ 250 m/s 的撞击试验,提出了引擎侵彻深度的计算公式,比美国核能研究院( NEI) 建议的公式更为准确,

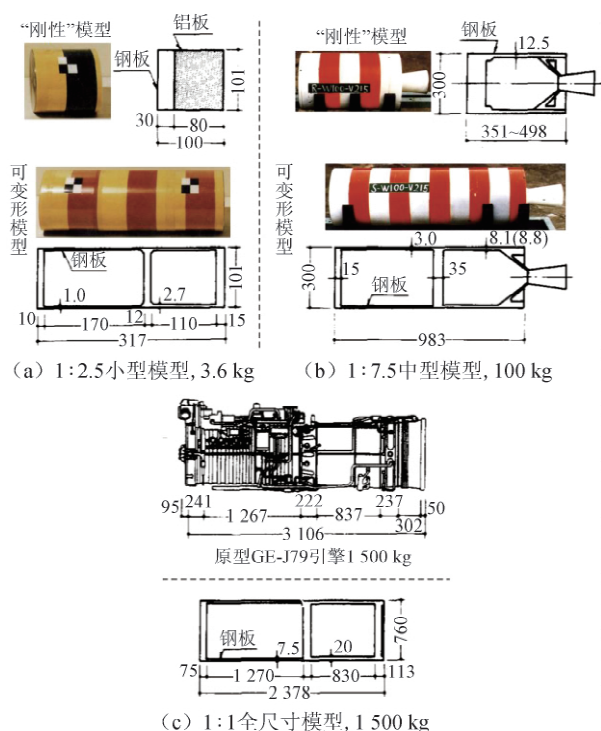

图4 缩尺引擎模型

Fig. 4 Scaled engine models

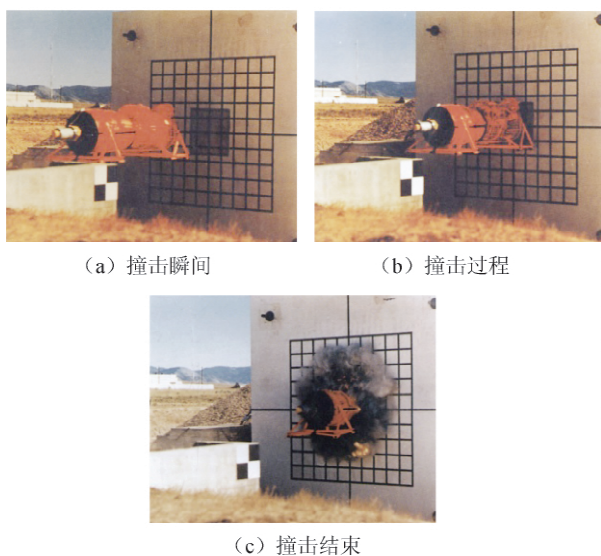

图5 GE-J79 原型引擎撞击过程

Fig. 5 Impact process of GE-J79 prototype model

并进一步提出了引擎弹道极限、贯穿极限以及残余速度的计算公式。

### 1.2.2 数值模拟

Sawamoto 等<sup>[114]</sup>采用离散元方法 (discrete element method, DEM) 对 Sugano 等<sup>[104-105]</sup>的引擎撞击试验进行了数值模拟,较好地再现了试验现象。Thai 等<sup>[115]</sup>基于 Riedel 等<sup>[110]</sup>试验开展了参数分析,并通过对比引擎模型变形、残余速度和靶体开坑尺寸等验证了数值模拟方法的正确性。

了引擎撞击 UHPC 靶板的临界震塌和贯穿公式。Almomani 等<sup>[116]</sup>对 B747 飞机引擎(直径 2.7 m,长度 4.3 m,质量 4.4 t)撞击乏燃料罐(直径 2.1 m,高度 5.4 m,壁厚 0.201 m,质量 97 t)进行了数值模拟,对罐体结构响应和损伤破坏进行了分析,其中对于引擎贯穿乏燃料池厂房后的残余速度,采用经验公式进行计算。Zhang 等<sup>[111-112]</sup>提出了纤维增强混凝土的细观建模方法,对开展的引擎撞击试验进行了数值模拟,通过对比引擎模型变形、残余速度和靶体开坑尺寸等验证了数值模拟方法的正确性。

### 1.3 撞击作用下核岛厂房结构振动分析

Thai 等<sup>[100]</sup>对韩国 KSNP 核电站附属厂房进行了飞机撞击的耦合分析,评估了整体和局部破坏以及振动效应对结构安全性的影响,结果表明,此厂房的振动加速度过大,进而无法保证内部设备安全,达到了美国核能管理委员会的核电站停堆要求。Petrangeli<sup>[117]</sup>基于二维简化的核电站结构,采用 SAP2000 和 ANSYS 软件分析了飞机撞击作用下结构的振动问题。Lin 等<sup>[118]</sup>采用非耦合方法将 B767-400 和 B747-400 飞机的撞击荷载直接加载于安全壳结构,并考虑了厂房基础和土体的相互作用,分析了安全壳筒体撞击位置高度对结构振动响应的影响。Siddiqui 等<sup>[119]</sup>以容许裂缝宽度为标准,基于 Abbas 等<sup>[120]</sup>的分析对没有内覆钢衬里的安全壳建立了简化分析模型,研究了飞机质量、撞击速度、钢筋直径和布置间距等因素对结构可靠性的影响。Tennant 等<sup>[121]</sup>应用 RAAIT 软件,快速评估了飞机对军、民用建筑结构的撞击破坏作用。Kostov 等<sup>[122]</sup>对飞机撞击作用下 A92 核电站安全壳进行了安全评估,分别基于单一 SHELL 单元和 SOLID 单元的两种安全壳模型,采用了耦合方法(B747 飞机)和非耦合方法(分别采用 Riera 模型和耦合分析得到的撞击力),并考虑了不同的撞击位置对结构安全的影响。

综上,在 2001 年 9·11 恐怖袭击事件之前,主要研究飞机对平面靶板的撞击荷载,所采用的方法主要为理论推导以及原型/缩尺的战斗机及其引擎的撞击试验。9·11 事件之后,认识到商用飞机撞击的巨大破坏力以及核电站面临的安全威胁,飞机撞击的相关研究发生了以下变化:1) 飞机从以前的轻型战斗机转变为质量更大、被劫持可能性更大的商用飞机;2) 被撞击结构从平面靶板转变为核电站的厂房结构和圆筒形安全壳,其结构形式和结构材料也发生了变化;3) 研究重点从较为基础的撞击荷载转向结构动态响应与损伤破坏的非线性分析;4) 研究方法更多的依靠精细化有限元数值模拟以及缩尺撞击试验。

## 2 课题组研究工作进展

近年来,在国家自然科学基金创新研究基金“侵彻冲击爆炸效应与工程防护”,国家自然科学基金面上项目“冲击爆炸作用对核安全壳的毁伤效应研究”和“大型客机撞击下核电站屏蔽及附属厂房的损伤破坏与振动响应研究”资助下,课题组进行了核电站抗飞机撞击的基础理论、数值模拟和试验研究工作,主要包括大型飞机撞击力的理论模型,飞机撞击全过程的精细化数值模拟,引擎撞击局部效应的试验与数值计算等方面。文中将主要介绍课题组在大、中型商用飞机撞击核岛设施整体响应的精细化数值仿真(采用 LS-DYNA 有限元分析软件)以及飞机引擎撞击的局部效应两部分研究工作的进展。

### 2.1 飞机撞击核岛设施的精细化数值模拟

#### 2.1.1 核岛设施的精细化有限元模型

为了分析飞机撞击作用下结构的动力响应和损伤破坏,课题组建立了四种核岛设施的精细化有限元模型,包括单层预应力钢筋混凝土屏蔽厂房、普通钢筋混凝土屏蔽与附属厂房、钢板混凝土屏蔽与附属厂房以及普通钢筋混凝土冷却塔。

1) 预应力钢筋混凝土屏蔽厂房。图 6a 是典型的单层预应力钢筋混凝土屏蔽厂房,主要包括混凝土、钢筋、预应力钢束和套管,以及内覆钢板。屏蔽厂房有限元模型的局部细节如图 6b 所示。混凝土材料采用 Solid 单元模拟,单元边长为 250 mm,共有 60.3 万个。钢衬里采用 Shell 单元进行离散,单元边长为 250 mm,共有 14.7 万个。壳壁内环向、竖向以及穹顶的预应力钢束,如图 6c 所示,采用 Beam 单元模拟,单元边长为 200 mm,共有约 25.8 万个;钢束预应力的施加采用后张法,因此在主体混凝土结构中预埋了套管,其有限元模型共离散为约 145.9 万个 Shell 单元。此外,在壳壁内还布置了两层普通钢筋网,其布置形式和尺寸如图 6d 所示,采用 Beam 单元,单元边长为 200 mm,共有 47.3 万个,钢筋单元与周围的混凝土单元没有考虑滑动摩擦效应,假定为固定连接。

2) 普通钢筋混凝土屏蔽与附属厂房。与 0.9 m 厚的单层预应力钢筋混凝土屏蔽厂房不同,双层钢筋混凝土屏蔽厂房的外层厂房为壁厚 1.5 m 的普通钢筋混凝土结构,其与内层厂房隔离开以更好的阻隔外部冲击,因此,仅建立了直接承受飞机撞击的外层普通钢筋混凝土屏蔽厂房,同时考虑了屏蔽厂房产上部的储水箱(水体采用 SPH 单元进行模拟)以及中部的设备进出孔洞。屏蔽厂房的混凝土划分为约 140 多万个边长约为 250 mm 的 Solid 单元,钢筋网采

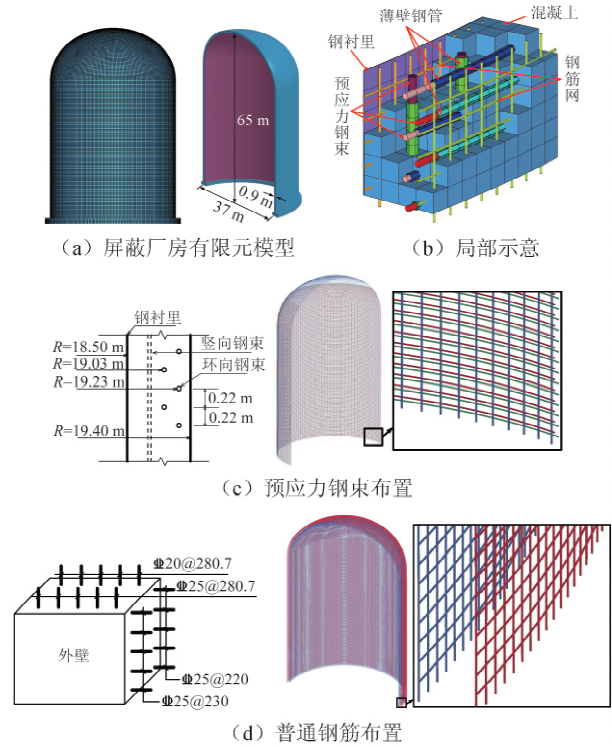

图 6 预应力钢筋混凝土屏蔽厂房模型

Fig. 6 Finite element model of pre-stressed RC containment

用 300 多万个 Beam 单元进行模拟,并将其与混凝土单元进行耦合共同受力。为了更真实地反映屏蔽厂房的受力环境以及飞机燃油和碎片的抛撒空间,还建立了其周围安全厂房和燃料厂房的有限元模型。为了节省计算时间,附属厂房离散为 Shell 单元(约 8 万多个),并按照实际工程设置其与屏蔽厂房的连接或接触。建立的精细化有限元模型如图 7 所示。

3) 钢板混凝土屏蔽与附属厂房。AP1000 屏蔽厂房筏基采用大体积混凝土一次性整体浇筑技术,防护要求最高的屏蔽厂房和附属厂房乏燃料池外墙均采用钢板/混凝土组合结构。如图 8 所示,屏蔽厂房主要结构包括筒身、进气口、锥形屋面、PCS 水箱。细部结构包含钢筋、牛腿、钢梁、加劲板。筒身为双层钢板混凝土结构,内含拉筋连接两侧钢板。屏蔽厂房与辅助厂房连接处为钢筋混凝土结构。进气口主要位于筒身与锥形屋面连接处,结构含有很多圆形穿管,用于外部冷却空气进入,进气口也是双层钢板混凝土结构,含有对拉钢筋。锥形屋面为单侧钢板混凝土结构,背覆钢板,混凝土内配置钢筋网。PCS 水箱内含钢板,配置钢筋网。在进气口,锥形屋面底端含有加劲板,其中进气口处布置有牛腿,用于支撑钢梁,钢梁布置于锥形屋面内侧,起到支撑作用。

辅助厂房有限元模型如图 9 所示,该模型主要包括楼层和乏燃料池,并与屏蔽厂房相连。楼层中



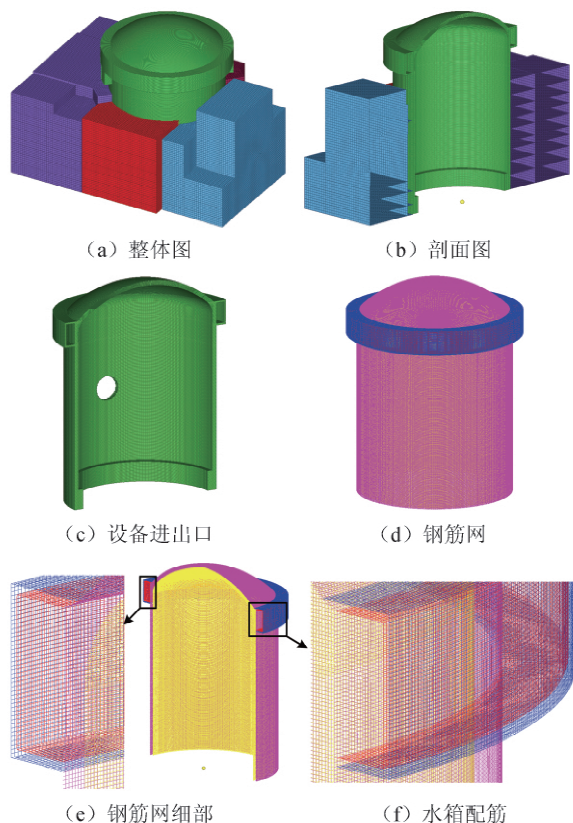

图7 屏蔽和附属厂房有限元模型

Fig. 7 Finite element model of RC containment and auxiliary buildings

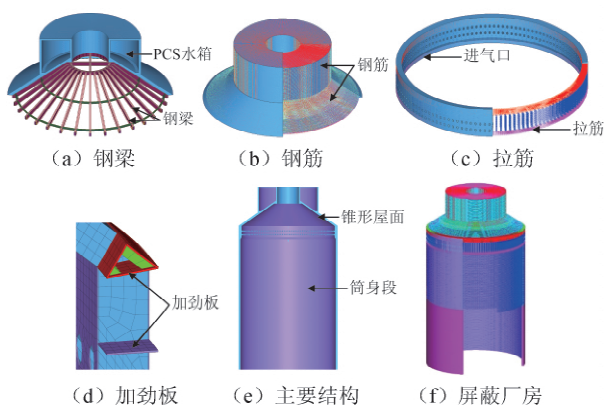

图8 钢板混凝土屏蔽厂房有限元模型

Fig. 8 Finite element model of steel-concrete containment

的隔墙和门窗都按照实际尺寸绘制。乏燃料池外墙配置钢筋和钢板,顶部配置钢梁。对屏蔽厂房和辅助厂房建模,共同构成 AP1000 有限元模型,如图 10 所示。

4) 普通钢筋混凝土冷却塔。冷却塔高 148 m,底部直径 108 m,顶部直径 69 m;塔壁的厚度从底部到顶部从 1 m 连续变化到 0.555 m;喉部直径为 32.5 m,厚度为 0.2 m。塔身由 96 个倾斜的人字柱支撑,柱高为 10 m。冷却塔精细化有限元模型如图 11a 所示。

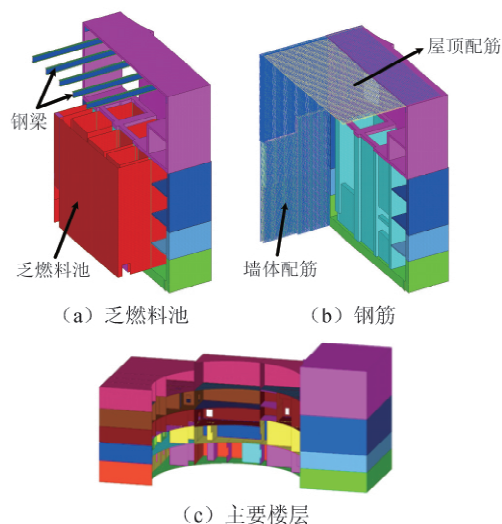

图9 辅助厂房有限元模型

Fig. 9 Finite element model of auxiliary buildings

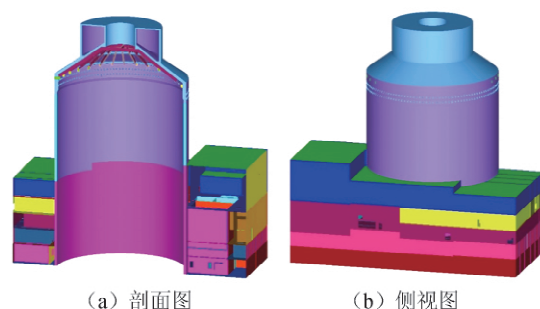

图10 AP1000 厂房有限元模型

Fig. 10 Finite element model of AP1000 plant

有限元模型共包含约 81.8 万个混凝土 Solid 单元和 342.8 万个钢筋 Beam 单元。冷却塔的塔身和人字柱均为钢筋混凝土结构。图 11b 给出了塔身的径向和切向剖面,显示了环向钢筋、子午线钢筋和拉筋的布置方式。大多子午向钢筋长度为塔身结构的 3 层,为了增强结构的横向稳定,相邻的子午向钢筋上下错开分布在不同的 3 层结构中。塔身结构中所有拉筋直径为 8 mm,间距为 600 mm。图 11c 为人字柱的空间布置和配筋,每根人字柱内布置 25 根纵筋和 2 种螺距的螺旋箍筋,柱的顶部和底部布置螺距为 80 mm 的螺旋箍筋,而柱中布置螺距为 150 mm 的螺旋箍筋,纵筋在箍筋内环向分布。

5) 混凝土及钢筋(束)材料模型。混凝土模型选取对于分析结果的可靠性至关重要,课题组采用 MAT\_159/MAT\_CSCM\_CONCRETE<sup>[123-124]</sup>和 MAT\_84/MAT\_Winfrith<sup>[125]</sup>等模型,对 Mizuno 等开展的 1:7.5 飞机模型撞击试验<sup>[31]</sup>,可变形弹体撞击 RC 靶板的 Meppen 试验<sup>[33-35]</sup>,以及 GE-J79 原型引擎及其缩尺模型撞击钢筋混凝土靶板的试验<sup>[103-104]</sup>进行了数值模拟,验证了上述混凝土材料模型的有效性和适用性。

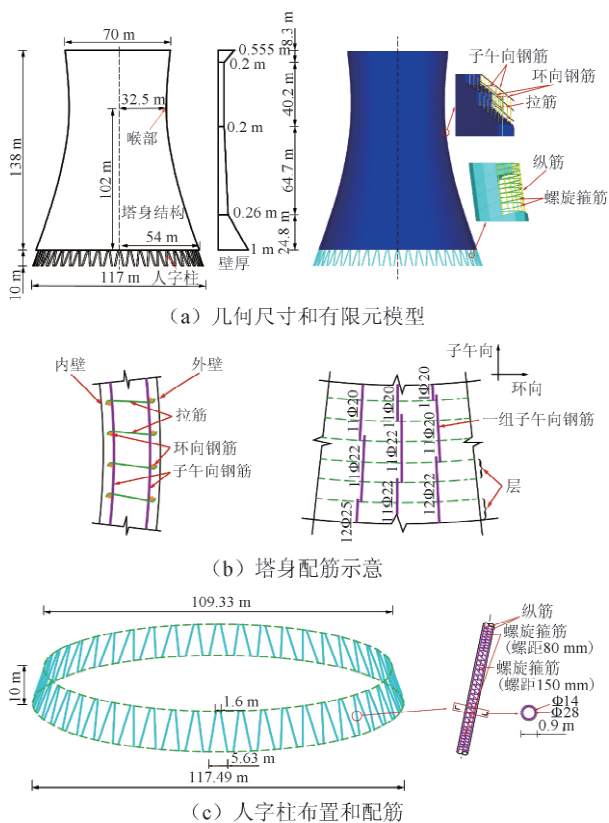

图 11 双曲线冷却塔有限元模型

Fig. 11 Finite element model of hyperbolic cooling tower

钢筋和预应力钢束均采用随动硬化材料模型 MAT\_003/MAT\_PLASTIC\_KINEMATIC ,同时考虑应变率效应和失效应变。

### 2.1.2 飞机的精细化有限元模型

对核岛设施造成撞击威胁的飞机 ,从总体上可以分为军用战斗机和商用客机两类。战斗机质量和尺寸相对较小 ,但是质量分布较为集中 ,刚度相对较大 ,巡航速度较高 ,易对结构造成局部破坏;商用客机的特点是质量和尺寸相对较大 ,但是质量分布较为分散 ,刚度相对较小 ,在撞击过程中更易被压屈、压溃 ,会对结构造成整体或局部破坏。对于军用战斗机 ,选择具有代表性的鬼怪式 F4 战斗机作为研究对象。对于商用飞机 ,从两个方面考虑:一方面是飞机的吨位尺寸 ,目前全球最大的商用客机是空客 A380 ,其最大起飞质量达到了约 575 t ,翼展约 80 m ,而波音 B747 相对较小 ,其最大起飞质量约 397 t ,翼展约 64 m ,分析中选择 A380 作为分析对象;另一方面是飞机的数量和使用频率 ,目前全球服役数量最多的机型是空客 A320 和波音 B737 ,并且两者的结构、吨位和尺寸较为接近 ,本节中选择 A320 作为分析对象。此外 ,还选择了国产新舟 MA600 作为支线小飞机的分析对象。

1) F4 战斗机。F4 战斗机的长度 17.74 m ,翼展

宽度 11.77 m ,高度 5.02 m。在原型撞击试验中 ,卸除了飞机内部的航空电子设备以及座椅等 ,剩余质量约为 12.7 t。为了分析燃油的撞击效应 ,将 4.8 t 的水置于机身内用以代替燃油。此外 ,还在机身底部安装了相关结构用于飞机在轨道上滑动 ,最终整架飞机的质量约为 19.0 t。飞机的机身、引擎和油箱均采用 Shell 单元进行模拟 ,4.8 t 的燃油采用 SPH 方法模拟。此外 ,为了调整飞机的质量分布 ,采用 ELEMENT\_MASS 单元进行配重。建立的 F4 战斗机的有限元模型如图 12 所示。飞机模型总质量为 19.0 t ,共约 9.6 万个 SHELL 单元 2.3 万个 SPH 单元和 3.2 万个 ELEMENT\_MASS 单元。

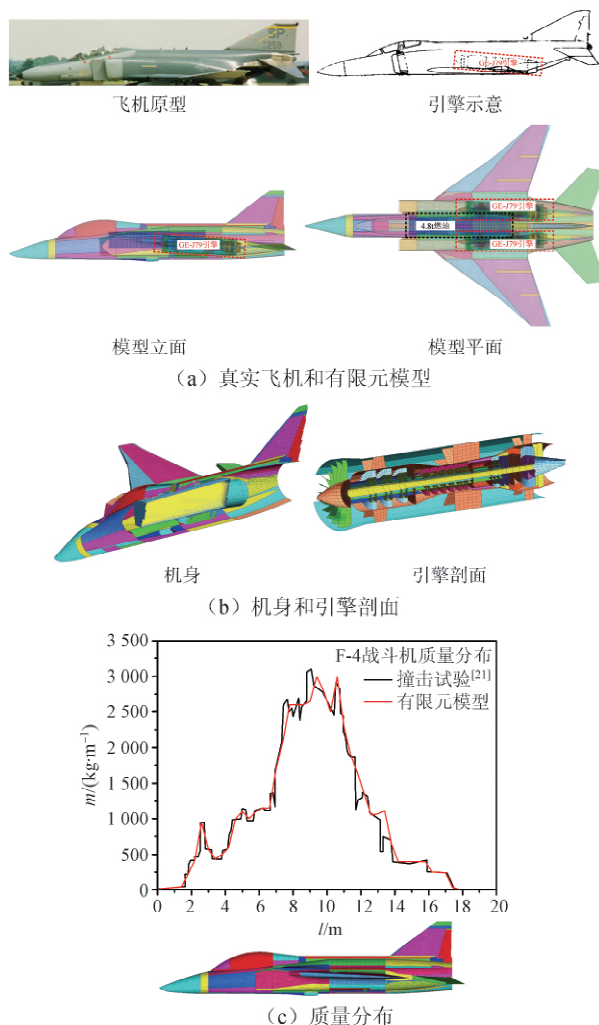

图 12 F4 战斗机有限元模型

Fig. 12 Finite element model of F4 fighter

2) A380 客机。空客 A380 的最大起飞质量约为 575 t ,其中包含了燃油质量约 242 t ,考虑到飞机在飞行过程中会大量的消耗燃油 ,假定在燃油还剩约 70 t 时发生撞击 ,则飞机总质量约为 400 t。机身蒙皮、机翼蒙皮和地板面板均划分为 Shell 壳单元 ,机身隔框和桁条、机翼主梁和次梁等以及地板的纵横梁均划



分为 Beam 梁单元,此外,连接机翼与机身的结构部件也采用 Beam 梁单元。引擎则按照几何模型全部划分为 Shell 壳单元。飞机燃油一般情况下对称配置在机翼内,采用 SPH 单元处理其大变形问题。飞机上的附属荷载,如乘客、行李、座椅、电子设备和内部塑料装饰等,在撞击过程中,由于不承受纵向压屈荷载(或承受的纵向压屈荷载很小),为此,未建立其几何形态(考虑其对纵向压屈荷载影响很小且模型过于复杂),而是通过 LS-DYNA 中的 ELEMENT\_MASS 单元将其质量对应地均匀分布在飞机结构上。建立的 A380 飞机有限元模型如图 13 所示,共包含约 83 万个单元(其中约 52.5 万个 Shell 单元,约 11.6 万个 Beam 单元,约 8.9 万个 Mass 单元,约 10.0 万个 SPH 单元)。飞机不同部位连接采用共节点的方式处理,而不是真实的螺丝锚固或者焊接,该简化模拟对飞机整体撞击效应所造成的误差可以忽略不计。

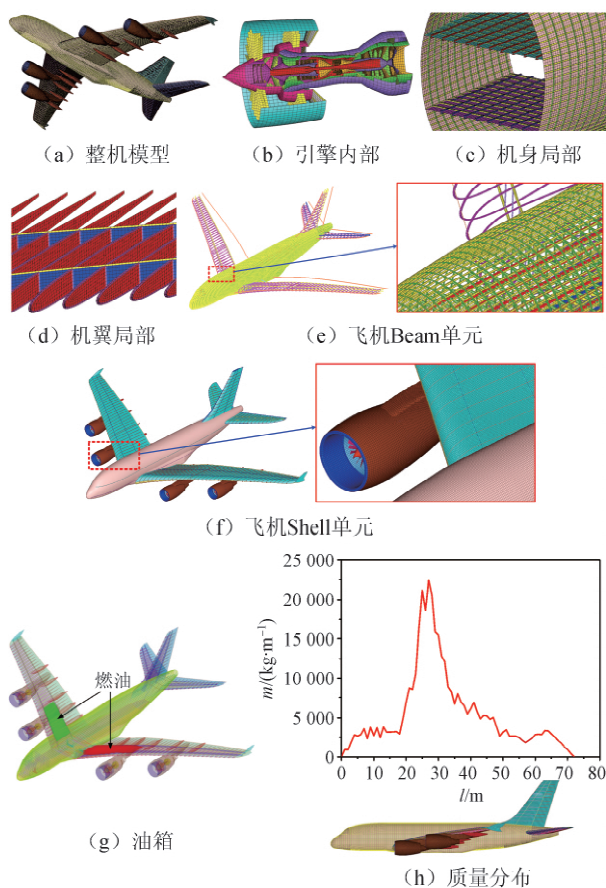

图 13 空客 A380 飞机有限元模型

Fig. 13 Finite element model of Airbus A380 aircraft

3) A320 客机。空客 A320 为单层双引擎飞机,其翼展约 34 m,机身长度约 38 m,机身高度约 12 m,最大起飞质量约为 78 t,可载客约 150 人,采取与 A380 飞机类似的建模方法,建立有限元模型如图 14 所示。A320 飞机包括地板梁、机翼主梁和起落架等主要受力构件,以及隔框、桁条和飞机蒙皮等次要受

力构件,此外还有两台引擎和位于机翼内的航空燃油。在有限元模型中,主梁和隔框等梁式构件采用 Beam 单元模拟,蒙皮和引擎等采用 Shell 单元模拟,燃油为 SPH 单元,座椅设备和人员行李等采用 ELEMENT\_MASS 单元进行配重。A320 飞机模型总质量约为 72.2 t,由约 20 万个单元组成。

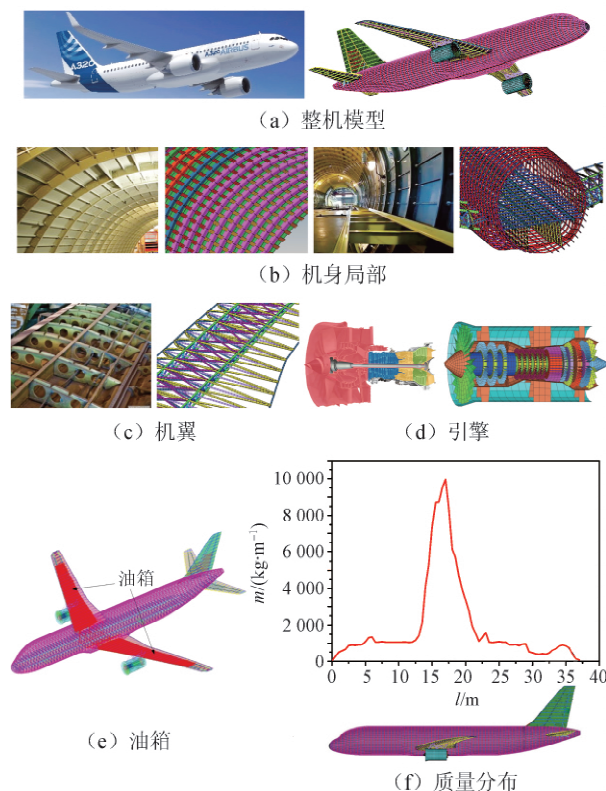

图 14 空客 A320 飞机有限元模型

Fig. 14 Finite element model of Airbus A320 aircraft

4) MA600 客机。新舟 MA600 飞机是国产支线小飞机,空质量约为 14 t,翼展约为 30 m,主要用于国内中短途飞行。考虑到 MA600 飞机的质量较小,因此将模型的质量由空重调整为其最大起飞质量(约为 21 t),共包括约 5.6 万个 Beam 单元和 6.5 万个 Shell 单元,但没有建立燃油 SPH 单元,其有限元模型如图 15 所示。

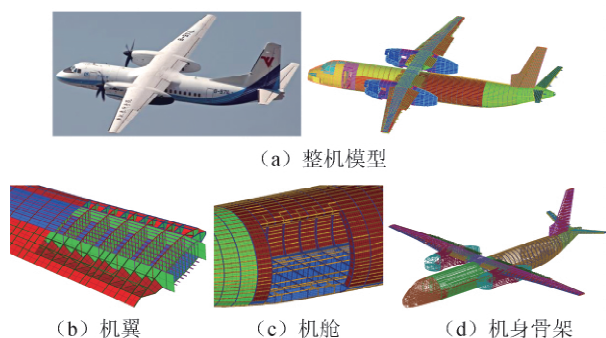

图 15 新舟 MA600 飞机

Fig. 15 MA600 aircraft

### 2.1.3 飞机撞击有限元分析合理性验证

考虑飞机建模的复杂性,基于飞机撞击荷载的时程曲线评估其有限元模型的合理性,共进行了3种客机撞击平面固定靶板的数值模拟,其中 Beam 单元采用简化的 JC 模型( MAT\_SIMPLIFIED\_JOHNSON\_COOK)。地板纵横梁等主要骨架为 4340 钢,桁条和隔框等次要受力构件为 2024 铝,飞机蒙皮、地板、引擎和油箱等采用 Shell 单元模拟,采用塑性随动硬化模型( MAT\_PLASTIC\_KINEMATIC)模拟铝合金材料并考虑应变率效应。飞机燃油采用 SPH 光滑粒子单元进行模拟,材料模型为 MAT\_NULL,状态方程为 EOS\_GRUNEISEN。相关参数取值见文献[90-95]。

通过数值模拟得到了4种飞机(F4, A320, A380 和 MA600)的撞击力、Riera 理论计算的 B707-320 的撞击力<sup>[14]</sup>以及 Sugano 等试验测量的原型 F4 的撞击力时程曲线<sup>[21]</sup>,如图 16a 所示。可见,由于飞机型号、尺寸、质量及撞击速度不同等,导致了撞击持续时间、撞击力幅值及其出现时刻存在明显差别,但撞击力时程曲线的变化规律基本相似,即前段机身撞击导致相对平稳的撞击力,而机翼和引擎的撞击则产生明显的荷载峰值,随着飞机速度的降低,在后段机身的撞击过程中撞击力逐渐减小。特别是, A320 飞机与 Riera 的 B707-320 飞机的质量和撞击速度都较相似,因此,其撞击力时程曲线更为接近。飞机对

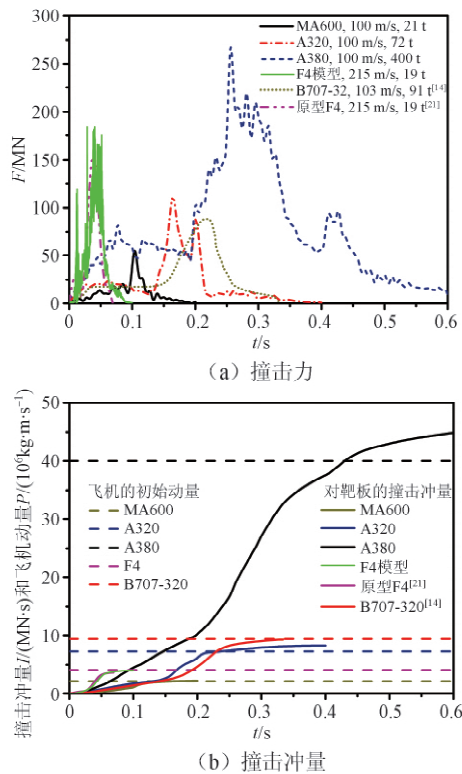

图 16 不同飞机对平面固定靶板的撞击力和冲量  
Fig. 16 Impact force and impulse of different aircrafts on rigid target plate

平面固定靶板的撞击冲量时程曲线以及对应的飞机初始动量如图 16b 所示。当撞击速度为 100 m/s 时,对于质量较大的飞机( A320 和 A380),由模拟得到的最大冲量比飞机初始动量高出约 12%,其原因是撞击引起了飞机的反弹;而对于质量较小的飞机( MA600),飞机碎片的反弹效果并不明显,原因在于质量较小的飞机被压碎的程度较小;对于所建立的 F4 战斗机模型,其撞击力和冲量与试验测量值吻合较好。因此,可以认为上述建立的4种飞机有限元模型较为合理。

### 2.1.4 飞机撞击核岛设施数值模拟结果及分析

基于上述已经建立的飞机与核岛厂房的精细化有限元模型,采用 LS-DYNA 动力计算软件,对 F4 战斗机、A320 和 A380 客机撞击核岛设施中的混凝土结构进行较为系统的数值模拟分析。

1) F4 战斗机撞击钢筋混凝土平板。首先对 F4 战斗机撞击混凝土平面靶板试验<sup>[21]</sup>进行数值模拟,撞击过程对比如图 17a 所示,可见,两者基本一致。F4 战斗机与靶板接触后,自机头开始被逐渐压屈破碎和飞散,暂未撞击到靶板的机身后部结构基本保

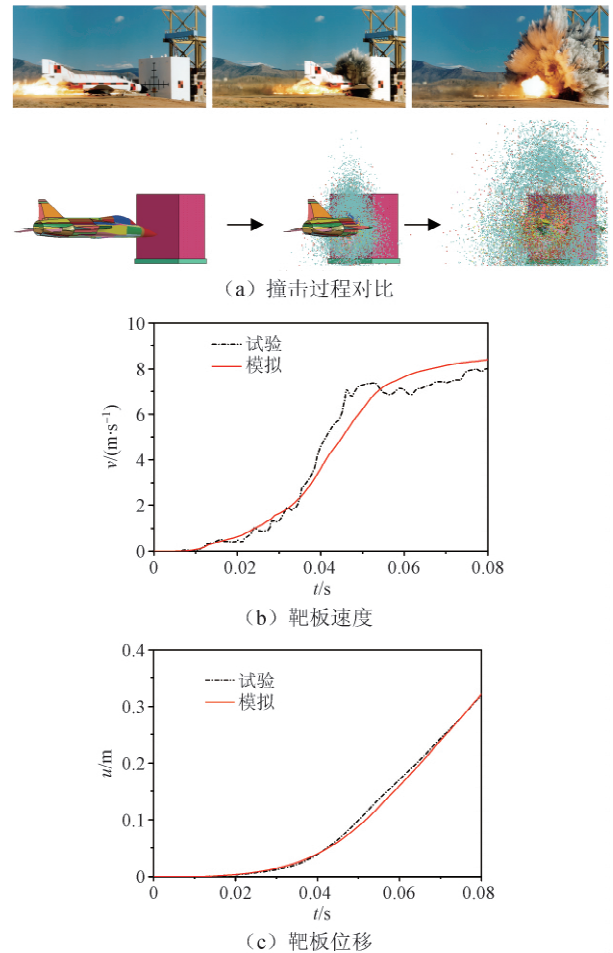

图 17 F4 战斗机撞击试验的数值模拟  
Fig. 17 Numerical simulation of F4 fighter impact test



持完整,虽然靶板在撞击方向上可自由移动,但是由于靶板质量约为飞机总质量的 25 倍。因此,靶板并没有发生较大的移动。靶板速度以及位移时程曲线的模拟结果与试验数据如图 17b、17c 所示,可见,两者吻合良好,进一步表明了 F4 战斗机有限元模型的合理性。

2) F4 战斗机撞击预应力 RC 屏蔽厂房。考虑到筒身高度约 2/3 处(30 m)较为薄弱<sup>[94]</sup>,因此选取该位置作为撞击点。撞击速度为 215 m/s,与 F4 战斗机撞击试验中的飞机速度一致。考虑最严重的撞击效果,即水平撞击且速度指向壳体的中轴线。屏蔽厂房的直径为 37 m,壳体壁厚为 900 mm,配筋率为 0.32%,环向和竖向钢束预应力分别为 4 MN 和 8 MN。不同时刻的撞击现象如图 18 所示,可以看出,当  $t = 0.025$  s 时,F4 战斗机的头部已经被压碎,但油箱还没有撞击到结构;当  $t = 0.05$  s 时,油箱破裂导致燃油开始抛洒,而机翼还没有完全撞击到结构;当  $t = 0.075$  s 时机翼和油箱基本完全被压碎,飞机损毁严重,燃油大面积抛洒;当  $t = 0.10$  s 时,F4 战斗机已经完全破碎,碎片四处飞散。屏蔽厂房的最大变形约为 420 mm,约为直径的 1/88。

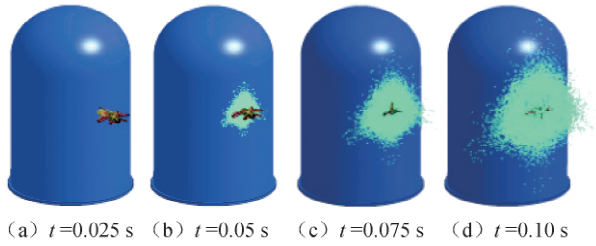

图 18 F4 战斗机撞击屏蔽厂房数值模拟

Fig. 18 Numerical simulations of F4 fighter impact on containment

飞机撞击屏蔽厂房与平面靶板时的接触面不同,因此得到的撞击力和冲量也不同,如图 19 所示,F4 对屏蔽厂房的撞击冲量约为撞击平面靶板的 78.7%,原因在于圆弧形屏蔽厂房对于撞击力具有分解削弱作用。

3) A320 客机撞击预应力 RC 屏蔽厂房<sup>[91]</sup>。选取与上节一致的撞击工况,同时采用耦合与非耦合方法进行撞击数值模拟分析,得到的撞击中心处挠度时程曲线如图 20 所示。可以看出: 1) 由于在撞击开始前对钢束施加了预应力,因此出现了初始挠度,约为 10 mm; 2) 当  $t > 0.07$  s 时,随着撞击力的迅速增加,挠度也快速增大; 3) 采用耦合方法计算的最大挠度约为 860 mm,而非耦合方法计算的仅约为 160 mm,明显偏小; 4) 随后,随撞击力的减小,预应力钢束的拉紧作用以及材料本身的弹性作用,变形出现了少量的恢复。

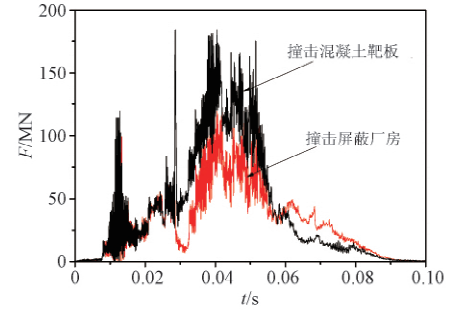

(a) 撞击力

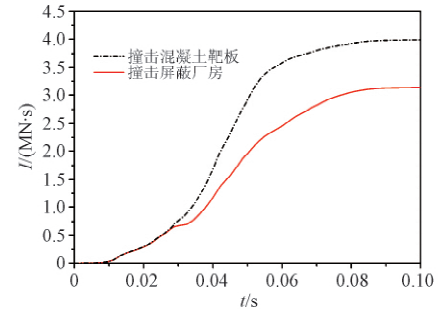

(b) 撞击冲量

图 19 F4 战斗机撞击屏蔽厂房的撞击力和撞击冲量

Fig. 19 Impact force and impulse of F4 fighter impact on containment

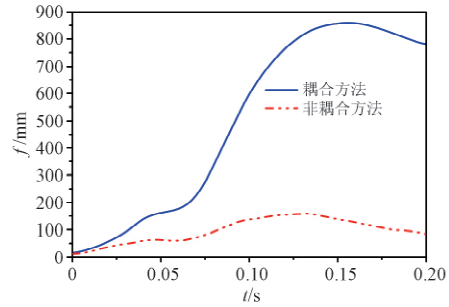

图 20 耦合与非耦合分析的撞击挠度

Fig. 20 Deflections of impact point from coupled and decoupled approaches

基于耦合分析方法得到了 A320 客机撞击预应力 RC 屏蔽厂房的整个过程。分析中选取撞击位置为筒身高度约 2/3 处(30 m)为基准工况(撞击点最大撞击位移为 860 mm),通过考虑撞击位置、角度、速度、屏蔽厂房壁厚、配筋率和钢束预应力的影响,开展了大量的数值模拟,结果见图 21。拟合得到撞击位置挠度的计算表达式为

$$D(a, v, h, r, p) = C(a) \cdot C(v) \cdot C(h) \cdot C(r) \cdot C(p) \cdot 860 \quad (2)$$

其中:  $a, v, h, r, p$  分别反映了角度、速度、壁厚、配筋率和预应力对撞击位置挠度的影响;  $C(a)$ 、 $C(v)$ 、 $C(h)$ 、 $C(r)$  和  $C(p)$  分别为上述参数的影响因子,表达式如下,具体见文献[91]。

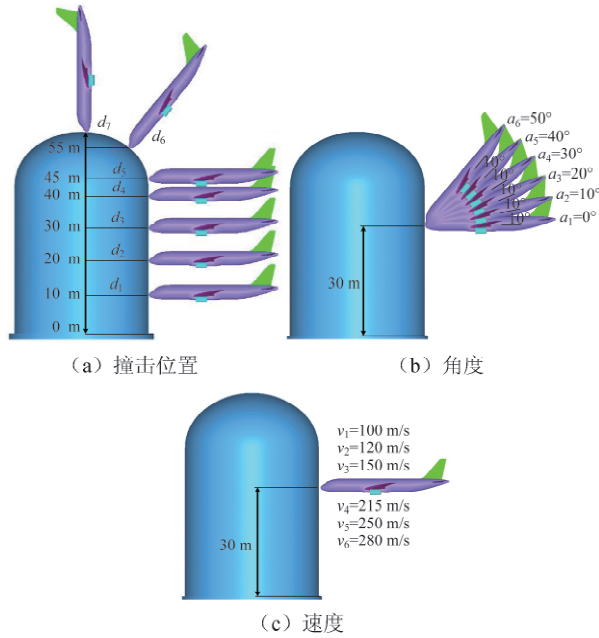

图 21 飞机撞击参数分析

Fig. 21 Parametric analyses of aircraft impact

对于角度因子,有

$$C(a) = \frac{9.806 \times 10^{-4} a^3 - 0.1159 a^2 - 2.238 a + 425}{a + 425} \quad (0^\circ \leq a \leq 50^\circ) \quad (3)$$

对于速度因子,有

$$C(v) = \frac{1.378 v^3 - 0.964 v^2 + 0.2297 v}{v^2 - 1.173 v + 0.8374} \quad (0.45 \leq v \leq 1.3) \quad (4)$$

对于壁厚因子,有

$$C(h) = \frac{-0.1638 h^3 + 0.858 h^2 - 1.802 h + 1.86}{h - 0.2845} \quad (1 \leq h \leq 2) \quad (5)$$

对于配筋率因子,有

$$C(r) = \frac{3.637 \times 10^{-2} r^3 - 0.3163 r^2 + 1.056 r + 0.3961}{r + 0.1878} \quad (0 \leq r \leq 4) \quad (6)$$

对于预应力因子,有

$$C(p) = \frac{-3.918 p^3 + 11.810 p^2 - 11.820 p + 6.100}{p + 2.170} \quad (0 \leq p \leq 1.2) \quad (7)$$

4) A380 客机撞击普通 RC 屏蔽厂房。普通 RC 屏蔽厂房的壁厚为 1.5 m,采用质量最大的 A380 客机进行撞击,且考虑了设备进出孔洞和周围的辅助厂房。撞击位置为筒身高度约 2/3 处,撞击速度为 100 m/s,当  $t$  分别为 0.2 s 和 0.6 s 时撞击现象及混凝土损伤如图 22 所示。由图可见,当  $t = 0.2$  s 时,飞机的机头部分已经被压屈,对直接撞击区域的混凝土造成了明显破坏,同时,引起屏蔽厂房底部以及水箱

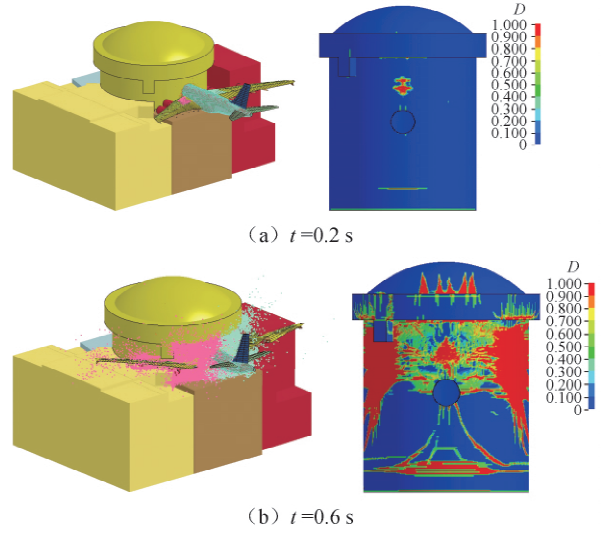

图 22 A380 撞击 RC 屏蔽厂房的现象及损伤云图

Fig. 22 Impact process and damage of RC containment under A380 aircraft impact

下部出现一定的损伤;当  $t = 0.6$  s 时,撞击作用已经基本结束,此时大部分机身已经被压碎,机翼折断且燃油大面积抛洒,除了直接撞击区域,周围混凝土还产生了大面积拉伸破坏。

将整架飞机的撞击力分为 3 部分进行计算,分别为机身(包括中央油箱、燃油和尾翼)、主机翼(包含机翼里的油箱和燃油)以及引擎,三者相加即为飞机的总撞击力,如图 23a 所示(为了便于观察和分析进行了低通 100 Hz 的滤波处理)。图 23b 给出了撞击中心处的挠度时程曲线(最大值约为 171 mm),可见,撞击挠度的变化规律和撞击力密切相关,撞击力的增大直接导致撞击挠度的增加,但是由于安全壳动力响应需要一定时间反应,因此撞击挠度峰值比相应的撞击力峰值略为“滞后”。

进一步分析还表明:若不考虑附属厂房的约束、结构的重力作用以及水箱储水的影响,会导致撞击位移略微偏大,对结构设计偏于保守和安全;若不考虑设备进出孔洞会使结构的整体性更好,即撞击位移偏小,这对于结构设计偏于不安全。进一步对比不同商用飞机的撞击效果,撞击示意如图 24 所示,考虑在飞机起降阶段出现事故并撞击屏蔽厂房的概率更大,因此,设置飞机的撞击速度约为 100 m/s。

根据飞机的长度不同,设置 MA600、A320 和 A380 客机撞击的计算时间分别约为 0.2、0.4 s 和 0.6 s,数值模拟得到的撞击破坏现象如图 25 所示。图 26 给出了撞击力时程曲线,可以看出:3 种飞机的撞击力变化规律相似,均是在引擎撞击时达到了荷载峰值,但是其尺寸和质量的不同导致撞击持续时间和峰值大小均有明显差别。

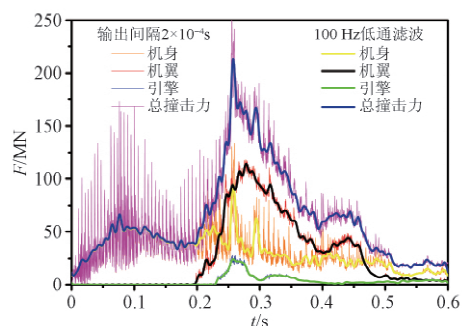

(a) 撞击力

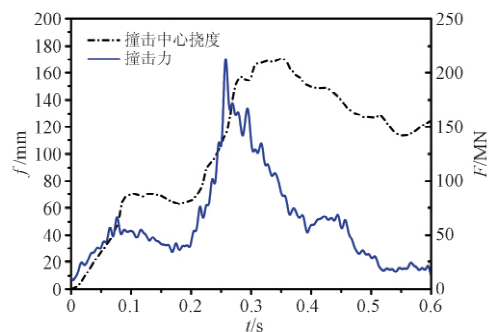

(b) 撞击挠度

图 23 A380 飞机撞击屏蔽厂房时程曲线

Fig. 23 Time histories of RC containment under A380 aircraft impact

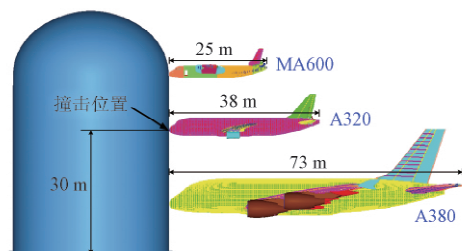

(a) 正视图

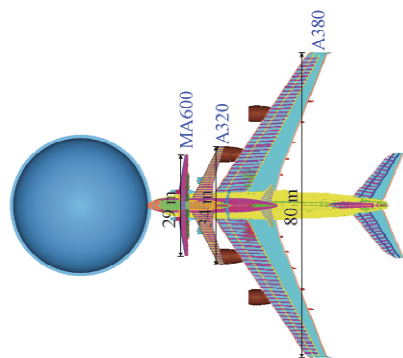

(b) 俯视图

图 24 3 种客机撞击普通 RC 屏蔽厂房示意

Fig. 24 Sketch map of three commercial aircrafts impacting on RC containment

撞击结束后屏蔽厂房的混凝土损伤如图 27 所示。可以看出：其损伤程度和区域均随着飞机质量和尺寸的增加而显著增大；除了直接撞击区域，基础部分的混凝土损伤也呈现受拉损伤随着撞击力的增加而变大。

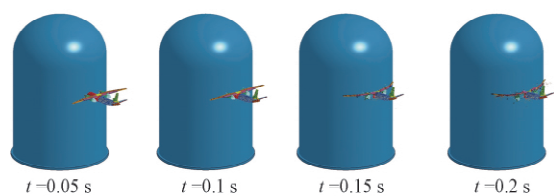

(a) MA600

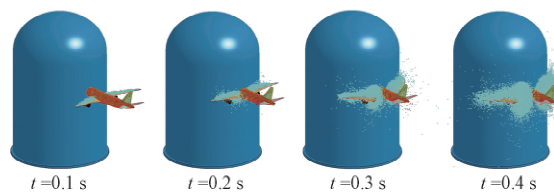

(b) A320

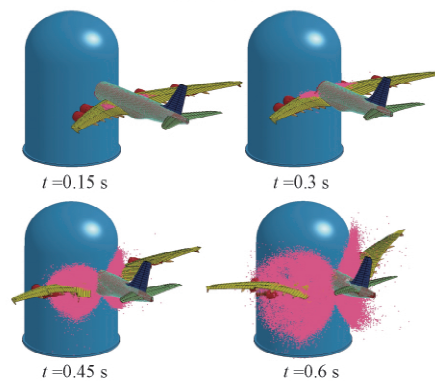

(c) A380

图 25 3 种客机撞击屏蔽厂房过程模拟

Fig. 25 Impact process of three aircrafts on containment

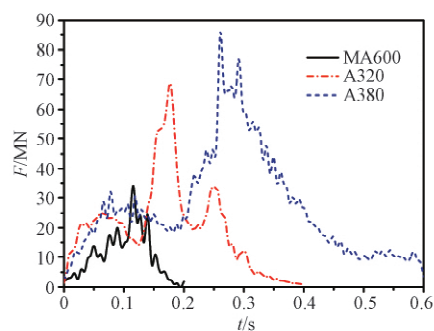

图 26 3 种飞机对屏蔽厂房的撞击力时程曲线

Fig. 26 Impact force-time histories of three aircrafts

5) A380 客机撞击 SC 屏蔽厂房与附属厂房。对 AP1000 屏蔽与辅助厂房遭受 A380 客机撞击作用进行数值模拟分析，屏蔽厂房内含钢制安全壳是为反应堆提供封闭环境，要求飞机撞击位置的挠度必须小于安全壳与内侧钢制安全壳的净空。辅助厂房内含乏燃料池，其墙体防护性能要求飞机撞击位置的挠度小于墙体与乏燃料池之间的距离。A380 客机撞击 AP1000 屏蔽和附属厂房的示意如图 28 所示，其中飞机垂直撞击屏蔽厂房筒身中部和乏燃料池侧墙，撞击位置距离屏蔽厂房底部分别为 32.1 m 和 17.4 m。



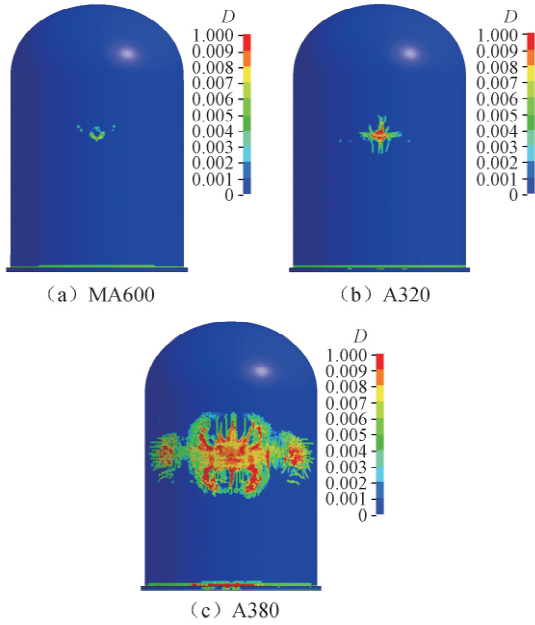

图 27 3 种飞机撞击下混凝土损伤

Fig. 27 Damage of containment concrete under impact of three aircrafts

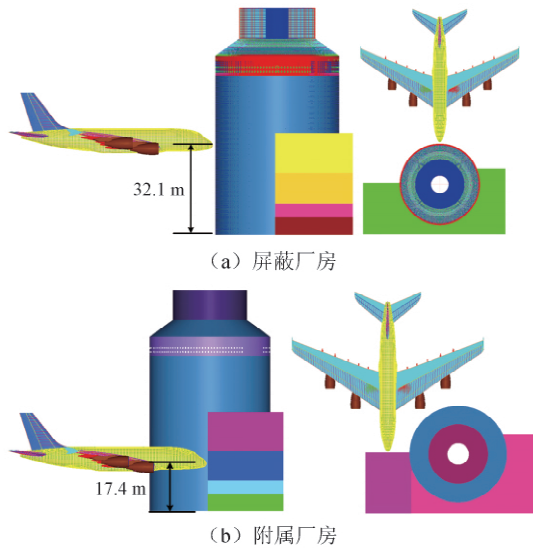

图 28 撞击示意

Fig. 28 Sketch map of aircraft impact

图 29a 给出了不同时刻飞机撞击屏蔽厂房筒身的俯视图和侧视图。可见,当  $t = 0.15 \text{ s}$  时,飞机机头部分与屏蔽厂房筒身区域碰撞,飞机机头前部发生压屈破坏。此时,飞机机身、机翼和机尾并没有变形,仍以既定的方向向前飞行;当  $t = 0.30 \text{ s}$  时,飞机机身中部、机翼和引擎与筒身发生碰撞,均发生不同程度的损伤破坏,飞机机翼所携带的油箱因变形过大破裂致使燃油抛洒;当  $t = 0.45 \text{ s}$  时,飞机机身与机翼连接的部位完全破坏,机翼与机身分离,与筒身接触的机翼也发生损伤破坏。同时,尾部的机翼在

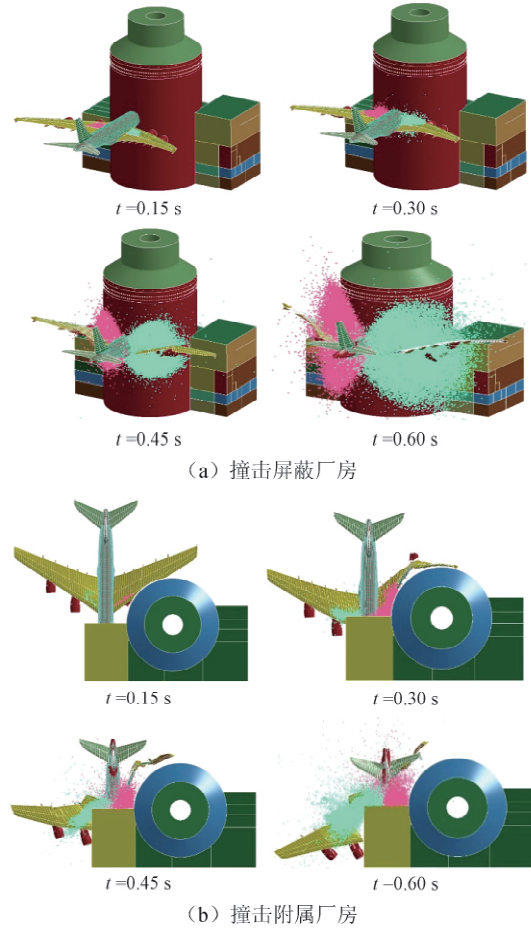

图 29 不同时刻飞机撞击过程

Fig. 29 Impact process of aircraft

惯性作用下仍然向前运动,因此机翼发生一定程度的偏转;当  $t = 0.60 \text{ s}$  时,飞机机翼向上偏转角度继续加大,由于右侧机翼初始撞击高度低于辅助厂房顶部以及机翼尾部偏转幅度较大,机翼与辅助厂房没有发生碰撞,燃油在惯性作用下继续运动,抛洒面积进一步扩大。此时,飞机机尾的速度已经很小,对安全壳的损伤可以忽略不计。同时,燃油抛洒面积达到最大。飞机撞击辅助厂房乏燃料池侧墙的过程如图 29b 所示。

图 30 分别给出了撞击中心处背覆钢板的位移和应变时程曲线。当  $t = 0.34 \text{ s}$  时,撞击中心处达到最大位移  $183 \text{ mm}$ ,撞击位置位于筒身跨中处,撞击处的挠度和损伤均为最大。屏蔽厂房与钢制安全壳距离为  $1342 \text{ mm}$ ,撞击中心处的位移远小于安全壳净空,表明屏蔽厂房筒身段在飞机撞击下偏于安全。辅助厂房撞击处最大位移为  $58 \text{ mm}$ ,其原因有两方面:一是由于撞击处墙体厚度为  $1676 \text{ mm}$ ,且有后覆钢板和双层配筋,防护性能优良;另一方面,由于飞机翼展较大,左侧机翼撞击屏蔽厂房,右侧机翼只有一部分与辅助厂房发生碰撞,所以作用有限。此外,被覆钢



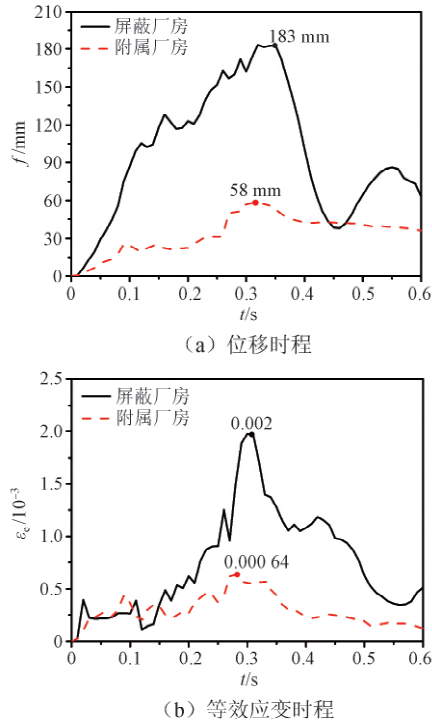

图 30 屏蔽和附属厂房撞击中心处背覆钢板的位移和等效应变时程

Fig. 30 Deflection and equivalent strain time histories of impact points on containment and auxiliary buildings

板的应变峰值为 0.002,未达到 NEI-07 规范中给出的钢板失效应变 0.05。乏燃料池西墙与乏燃料池外壁相距 1219 mm,因此,在飞机撞击下足够安全。

6) A320 和 A380 客机撞击大型 RC 冷却塔。作为核电站最高的结构,冷却塔会遭到蓄意和偶然破坏,因为其发生整体倒塌或者局部破坏产生的二次效应会严重影响到附近人员和核电设施的安全。目前,针对核电站冷却塔结构的破坏主要为风荷载、地震作用等,而关于飞机撞击冷却塔的研究极少。为此,分析中开展了 A320 和 A380 客机撞击大型双曲线冷却塔的数值仿真分析,撞击速度为 100 m/s,撞击部位为塔身壁厚最小的冷却塔喉部。针对冷却塔内部中空的特点,撞击可分为两阶段:阶段 I 为飞机撞击前壁,阶段 II 为飞机穿透前壁后撞击后壁。以 A380 客机为例,图 31 给出了撞击冷却塔的全过程,在阶段 I 中完整的飞机以初始速度撞向冷却塔,引擎在贯穿冷却塔前壁的过程中脱落,机翼与主体分离。在阶段 II 中,从 A380 客机主体脱落的机翼和引擎紧随机身以一定的速度撞向冷却塔后壁,机翼的撞击面积比机身的更大,因此,对于阶段 II,A380 客机脱落的机翼较机身对冷却塔造成了更为严重的破坏效果。

图 32 为塔身混凝土的损伤情况。从塔身的损伤情况可以看出,飞机贯穿了冷却塔的前后壁,但冷却

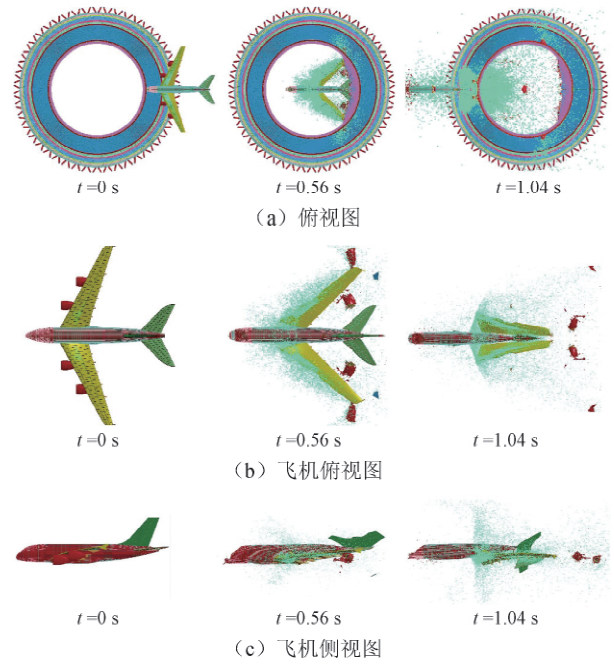

图 31 A380 客机撞击冷却塔过程示意

Fig. 31 Impact process of A380 aircraft on cooling tower

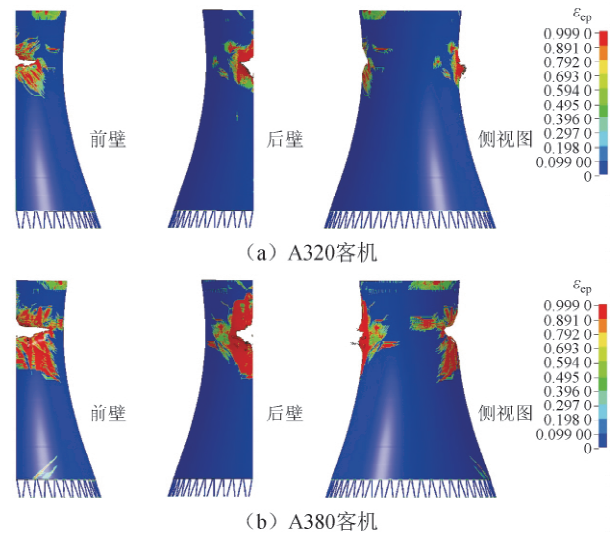

图 32 塔身混凝土损伤情况(有效塑性应变)

Fig. 32 Damage of cooling tower concrete (equivalent plastic strain)

塔没有出现大面积的崩塌,整体结构依然具有较好的稳定性。对比穿孔面积,A380 客机(约 72 m<sup>2</sup>)较 A320 客机(约 56 m<sup>2</sup>)使冷却塔前壁产生更大的破坏。

## 2.2 飞机引擎撞击核岛设施的局部效应分析

在飞机撞击过程中,核岛设施除了发生整体结构响应(如大变形、坍塌甚至倾覆等)外,在质量较为集中且刚度较大的引擎撞击作用下,还有可能发生局部破坏,如侵彻、震塌甚至贯穿等。为此,开展了缩尺引擎模型撞击普通和超高性能混凝土 UHPC 靶

板的试验,并结合理论分析和数值模拟,提出了相应的侵彻深度(引擎最终侵入靶板的深度)、残余速度(引擎贯穿靶板后的剩余速度)、弹道极限(靶板厚度一定时,引擎刚刚贯穿靶板的临界速度)和贯穿极限(引擎冲击速度一定,靶板刚刚被贯穿的厚度)计算方法。

### 2.2.1 缩尺引擎模型撞击普通 RC 靶板试验

1) 试验装置。基于 Sugano 等<sup>[103-104]</sup>试验对引擎的简化和缩尺方法,开展了 1/10 的缩尺试验<sup>[113]</sup>,引擎模型质量约为 1 500 g,材料为 45#钢,由 8 mm 壁厚 的钢管削薄并与 3 块不同厚度的圆形钢片焊接而成,如图 33 所示。考虑屏蔽厂房的实际壁厚为 1 500 mm,为此,亦采用 1/10 的缩比尺例,浇筑的钢筋混凝土靶板厚度为 150 mm,边长为 700 mm。引擎模型采用口径 250 mm 的空气炮进行发射,试验装置的整体布置如图 34 所示。

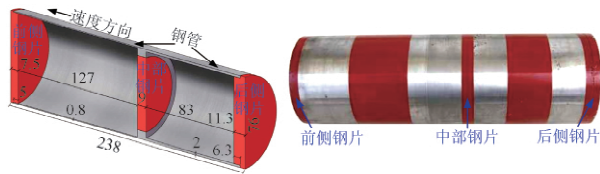

图 33 1/10 缩尺引擎模型

Fig. 33 1/10 scaled engine model

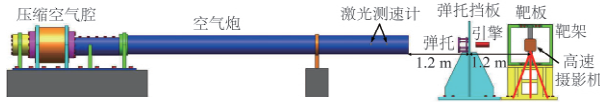

图 34 试验装置布置示意

Fig. 34 Sketch map of launching air gas gun

2) 试验结果及分析。试验中共进行了 9 炮次,弹体的撞击速度为 94 ~ 184 m/s,与设计的 100 ~ 200 m/s 较为吻合(起降速度约 100 m/s、巡航速度约 200 m/s)。当侵彻深度为 6 ~ 22 mm 时,靶板的受冲击面出现了不同尺寸的开坑,而背面基本没有任何损伤,表明在此工况下引擎撞击不会对该靶板造成严重的局部破坏。以冲击速度 110 m/s 为例,图 35a 给出了冲击试验的高速录像照片。可以看出:引擎模型的飞行姿态较好,接触到靶板后,靶板正面的混凝土有剥落且形成小碎块飞溅,而靶板背面没有出现混凝土剥落的现象。靶板正面的破坏如图 35b 所示。冲击形成了一个侵彻深度约 16 mm、直径约 110 mm 的主坑。在主坑周围出现了分散的较小的开坑,由后面破碎的弹托撞击造成。引擎模型的变形如图 35c 所示,其中前端厚度为 0.8 mm 的钢管基本被完全压屈断裂,而后部厚度为 2.0 mm 的钢管则没有明显的变形。

3) 侵彻深度计算方法。图 36 给出了课题组试

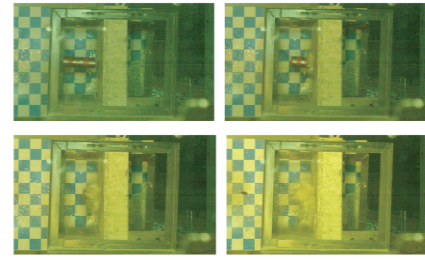

(a) 撞击过程

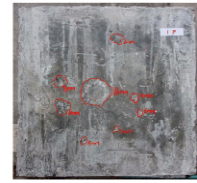

(b) 靶板正面破坏

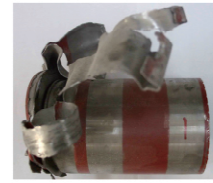

(c) 引擎模型变形

图 35 冲击速度 100 m/s 试验结果

Fig. 35 Test results with striking velocity of 100 m/s

验数据和 Sugano 等<sup>[103-104]</sup>的试验结果,并将不同比例试验下的侵彻深度换算为 1:1 比例下的数值。考虑适用范围、变化趋势以及试验数据点的分布规律等因素,对现有刚性弹侵彻的经验公式进行了对比筛选,初步选出了相对适用的 4 个经验公式,分别为 Modified Petry<sup>[126-127]</sup>、BRL<sup>[128-131]</sup>、Whiffen<sup>[132]</sup>以及 Haldar-Hamieh<sup>[133]</sup>建议的公式。通过引入折减系数对上述经验公式进行修正,经对比分析得到,对 Haldar-Hamieh 建议的公式引入折减系数 0.5 相对最为合适,如图 36 所示。修正后的公式为

$$\frac{h_{\text{pen}}}{d} = 0.5 \times \begin{cases} -0.0308 + 0.225 I_a & (0.3 \leq I_a \leq 4.0) \\ 0.6740 + 0.0567 I_a & (4.0 < I_a \leq 21) \\ 1.1875 + 0.0299 I_a & (21 < I_a \leq 455) \end{cases} \quad (8)$$

式中:  $h_{\text{pen}}$  为侵彻深度;  $I_a$  为冲击因子,  $I_a = MN^* V_0^2 / (f_c d^3)$ , 其中  $M$  为弹体质量、 $N^*$  为弹头形

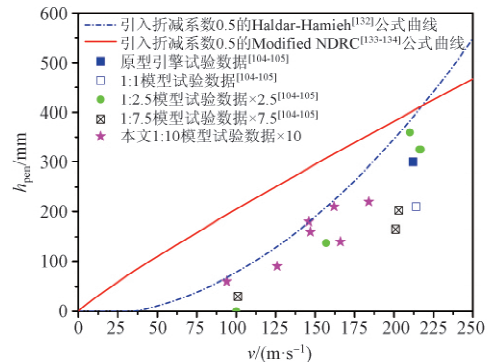

图 36 侵彻深度预测结果与试验数据对比

Fig. 36 Comparison of predicted results and test data of penetration depth



状系数(平头弹取 0.72)、 $V_0$  为弹体初始速度,  $f_c$  为混凝土设计抗压强度,  $d$  为弹体直径。

从图 36 可以看出,美国核能研究院(NEI)<sup>[5]</sup> 建议的公式(引入折减系数 0.5 的 Modified NDRC 公式<sup>[134-135]</sup>) 过于保守,特别是对于速度较低时偏差更大,而式(8)适用性更好。

## 2.2.2 缩尺引擎模型撞击 UHPC 靶板试验

1) 试验结果及分析。试验所采用的引擎模型以及发射、测量装置均与前文相同。靶板尺寸边长为 700 mm,厚度为 40 ~ 80 mm,每种厚度各 2 块,共计 12 块。掺入的短直型钢纤维体积含量为 2%,直径为 0.2 mm,长度 13 mm,抗拉强度 2 800 MPa。试验共分为两组<sup>[111-112]</sup>: ①第一组,撞击速度约为 250 m/s,共 6 炮次,主要研究引擎模型贯穿靶板后的残余速度; ②第二组,撞击速度均约为 120 m/s,主要研究不同的靶板破坏模式(如侵彻、震塌、临界震塌、贯穿、临界贯穿等),分析引擎模型的弹道极限和靶板的贯穿极限。

图 37 和图 38 分别给出了厚度 65 mm 和 50 mm 靶板分别在冲击速度为 244 m/s 和 139 m/s 下引擎撞击过程、引擎变形以及靶板破坏情况,这两组试验分别属于贯穿和临界贯穿破坏模式。

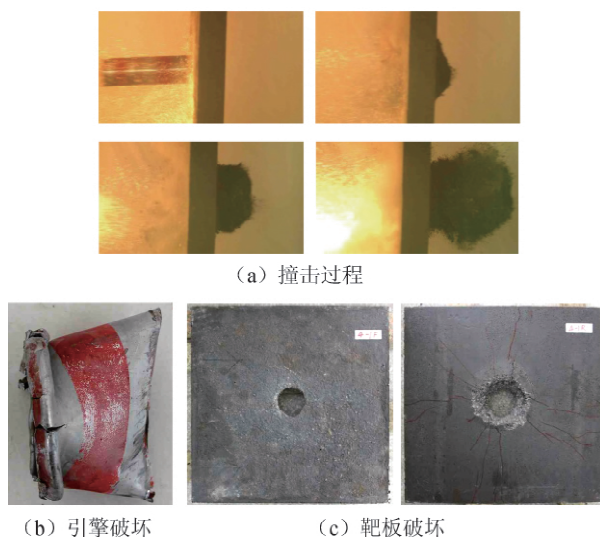

图 37 试验情况(靶板厚度 65 mm,冲击速度 244 m/s)  
Fig. 37 Impact test (target thickness of 65 mm, striking velocity of 244 m/s)

2) 细观模拟分析。为了更好地模拟纤维的增强作用,提出了一种细观模拟方法,即通过 MATLAB 编程在混凝土基体有限元模型中随机投放一定体积含量的纤维单元,具体建模方法与步骤等见文献[103]。基于单根纤维的拔出试验<sup>[136]</sup>描述纤维和基体的黏结滑移作用。提出方法的模拟结果与试验的对比如图 39 所示,二者吻合较好。图 40 给出了细观

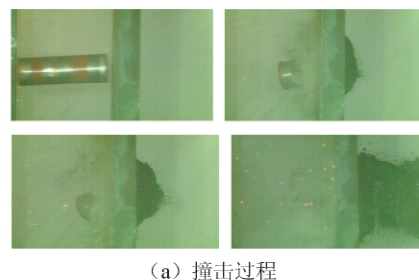

(a) 撞击过程

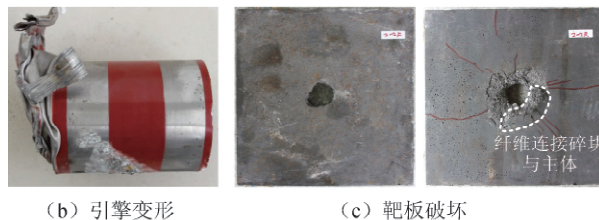

(b) 引擎变形

(c) 靶板破坏

图 38 试验情况(靶板厚度 50 mm,冲击速度 139 m/s)  
Fig. 38 Impact test (target thickness of 50 mm, striking velocity of 139 m/s)

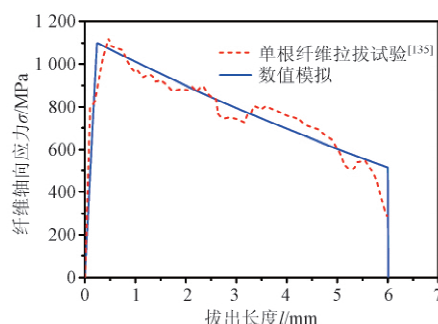

图 39 单根纤维拉拔试验与模拟的轴向应力对比  
Fig. 39 Comparison of experimental and numerical single-fiber pulling out stress

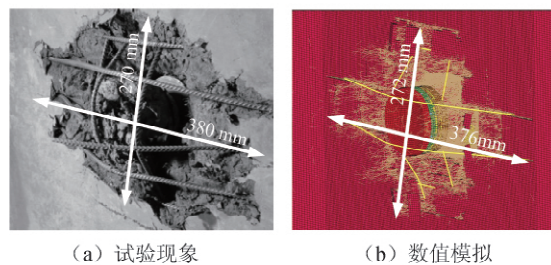

(a) 试验现象

(b) 数值模拟

图 40 Riedel 试验中的靶板破坏  
Fig. 40 Target failure in Riedel test

模拟结果与 Riedel<sup>[109]</sup> 的撞击试验的对比,二者吻合较好。

以厚度 40 mm 的靶板为例,建立的细观有限元模型如图 41 所示。对于引擎模型,将 3 个质量块共划分为 10 560 个 Solid 单元,厚度 0.8 mm 和 2.0 mm 的钢管共划分为 8 848 个 Shell 单元,单元尺寸均为 2.5 mm。混凝土基体由 640 000 个 Solid 单元组成,撞击中心区域(300 mm × 300 mm)的单元尺寸为

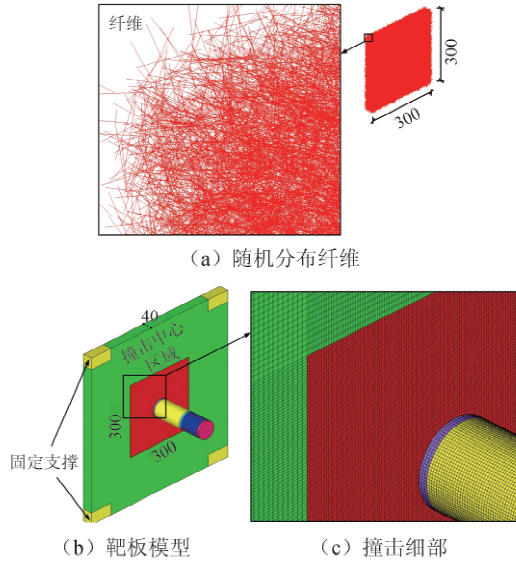

图 41 厚度 40mm UHPC 靶板的细观有限元模型  
Fig. 41 Mesoscale finite element model of UHPC target plate with thickness of 40mm

2.5 mm, 周围区域的单元尺寸为 5.0 mm。为了提高计算效率, 180 000 个纤维 Beam 单元仅投放在撞击中心区域, 对应的纤维体积率为 2.0%。

靶板破坏的数值模拟结果如图 42 所示, 同时也对比了宏观模型(纤维作用通过基体抗拉强度和断裂能表征)有限元模拟结果。对比结果表明, 细观模型可以较好地模拟引擎贯穿破坏模式以及开坑尺寸, 而宏观模型由于没有体现纤维的桥接和阻裂作用, 开坑面积明显偏大且有更多的混凝土碎片从靶背飞溅。

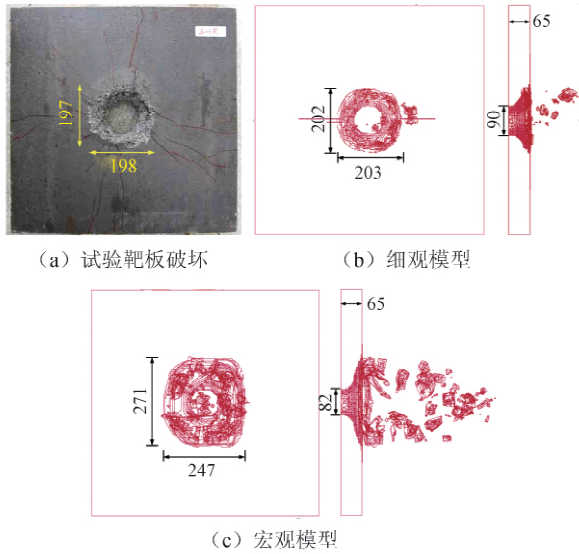

图 42 靶板破坏的试验和数值模拟结果对比  
Fig. 42 Comparison of tested and simulated results of panel damage

细观模拟结果与高速录像照片对比如图 43 所示。可以看出, 不同的靶板破坏模式、混凝土碎片的飞溅以及引擎模型的撞击姿态的模拟结果与试验现象均吻合较好。

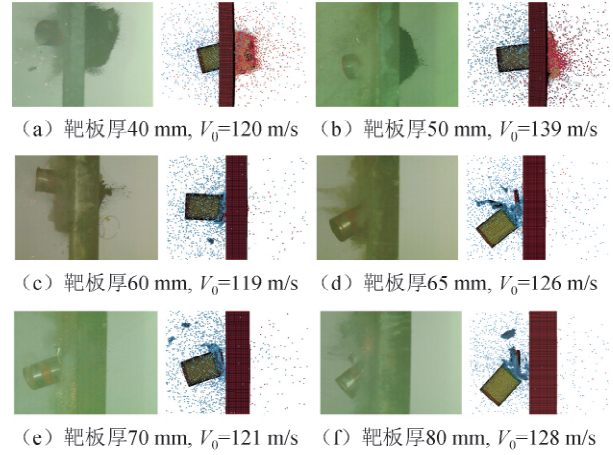

图 43 细观模拟结果与试验现象对比

Fig. 43 Comparison of mesoscale numerical and experimental impact process

3) 局部贯穿效应的计算方法。为了提出合理的引擎贯穿 UHPC 靶板的残余速度预测公式, 其中一个可行的方法是基于现有的引擎贯穿数据, 对刚性弹残余速度的预测公式(如修正的 NDRC 公式<sup>[134]</sup>和 UMIST 公式<sup>[137-138]</sup>等)进行修正。文献[138]中的研究表明, 上述两个公式对于平头刚性弹撞击混凝土薄板的弹道极限预测效果较好, 相比之下, 修正的 NDRC 公式应用更为广泛且形式简洁。结合 Grisaro 等<sup>[139]</sup>提出的刚性弹残余速度  $V_r$  的计算式, 提出了引擎贯穿残余速度计算式, 具体如下:

$$V_r = \eta V_0 \sqrt{1 - \left(\frac{V_{bl}}{\eta V_0}\right)^2 - \left(\frac{V_{bl}}{\eta V_0}\right)^{2\alpha} + \left(\frac{V_{bl}}{\eta V_0}\right)^{2\beta}} \quad (9)$$

$$\eta = 0.5 + \frac{0.5}{(1 + H/d)^2} \quad (10)$$

$$V_{bl} = 59.53 \times 1000d \left[ \frac{dG(H)}{KN^*M} \right]^{1/1.8} \quad (11)$$

$$K = 14.95 / \sqrt{f_c / 10^6} \quad (12)$$

$$G(H) = \begin{cases} 0.25 \left(\frac{P}{d}\right)^2 & \left(\frac{P}{d} \leq 2\right) \\ \frac{P}{d} - 1 & \left(\frac{P}{d} > 2\right) \end{cases} \quad (13)$$

$$\frac{P}{d} = \begin{cases} 2.2214 - \sqrt{4.9348 - 1.3928 \frac{H}{d}} & \left(\frac{H}{d} \leq 3\right) \\ 0.8065 \frac{H}{d} - 1.0645 & \left(3 < \frac{H}{d} < 18.06\right) \end{cases} \quad (14)$$



式中:  $V_0$  和  $V_r$  分别为引擎的初始冲击速度和残余速度;  $H$  为靶板厚度;  $d$  和  $M$  分别为引擎直径和质量;  $N^*$  为弹头形状系数, 对于平头、半球形、钝头和尖头的弹头取值分别为 0.72、0.84、1.0 和 1.14。

当  $V_r = 0$  时, 初始速度即为靶板的弹道极限速度  $V_{bl}$ , 此时的靶板厚度即为临界贯穿厚度。折减系数  $\eta$  表征了引擎变形吸能对靶板破坏能力的减弱作用。

图 44 给出了细观模型的模拟结果和式 (9) 预测曲线的对比, 由此可见, 两者整体上吻合较好, 验证了式 (9) 的合理性和准确性。

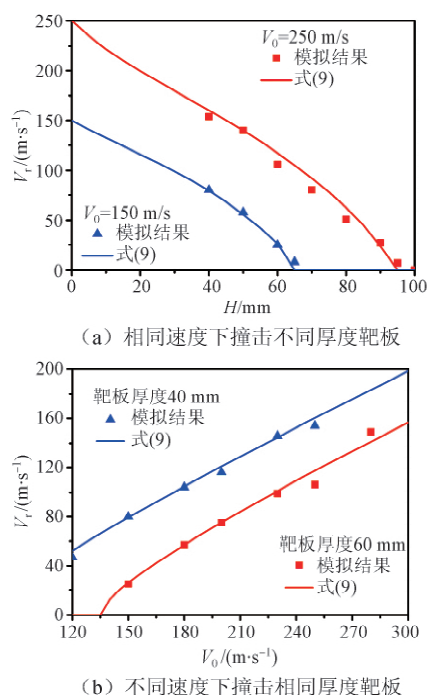

图 44 引擎贯穿 UHPC 靶板的残余速度

Fig. 44 Residual velocity of engine after perforating UHPC target plate

### 3 结论及展望

1) 大型客机撞击力的计算方法。已有研究包括美国核能研究院 NEI 07-43 指导手册在内, 普遍采用对 Riera 模型惯性力项进行折减来考虑撞击过程中飞机质量飞散和材料堆积等效应的影响。然而, 上述方法将会引起飞机在撞击方向动量不守恒, 从而使计算结果对于工程设计偏于危险, 故需要进一步评估其适用性并进行修正。此外, 已有工作主要针对中小型客机(质量不大于 80 t, 翼展不大于 40 m), 缺乏针对大型客机(质量约 560 t, 翼展约 80 m) 撞击力的深入、系统研究。

2) 大型客机撞击下核岛设施的损伤破坏。在原型飞机撞击试验难以开展的情况下, 进行飞机撞击全过程精细化数值仿真成为必由之路。已有研究不

足主要有: 弹-靶接触分析和撞击力时程分析两种方法的适用性和可靠性还存在分歧, 需要进一步评估; 已有工作主要针对中小型客机, 缺乏针对大型客机的精细化分析工作, 飞机模型建模的精细程度还没有公认的标准; 已有工作大多针对钢筋混凝土 RC 屏蔽厂房本身, 而针对新型屏蔽厂房结构, 同时考虑附属厂房的约束、设备进出孔洞的弱化和水箱等影响的研究工作还较少。此外, 乏燃料池作为贮存放射性乏燃料的厂房, 其相关抗撞分析和防护设计方法也是重要的研究内容。

3) 引擎撞击下核岛厂房的局部损伤破坏分析。已有对于引擎撞击的研究, 均是针对 RC 结构, 对于新型如钢板混凝土复合结构的相关研究较少, 缺乏引擎低速(不大于 200 m/s) 撞击局部响应理论计算模型。对于缩尺引擎撞击试验研究, 已有工作均针对 F4 战斗机引擎, 而对大型客机引擎的原型和缩尺撞击试验及其尺寸效应的研究仍是空白。

4) 大型客机撞击下核岛厂房及其内部设备的振动效应分析。飞机撞击作用下, 核岛厂房楼板振动加速度可达数  $10g$ , 此时厂房内部设备是否满足抗振要求, 是否达到停堆阈值, 尚无可遵循的标准, 目前均沿用美国核能研究院 NEI 07-43 指导手册。该方面的研究较少且仅限于附属厂房, 分析模型过于简化, 无法真实反映多层厂房结构特性。对于屏蔽厂房内部结构以及核岛厂房的内部设备振动, 尤其是原型设备冲击振动试验研究基本处于空白, 缺乏可靠的分析和评估方法。

5) 多灾害作用下核岛厂房的可靠性评估与结构设计方法。飞机撞击后引起燃油抛洒, 有可能引发火灾。此外, 现有核岛设施大多考虑基础隔振。因此撞击引起火灾, 以及考虑隔振措施的核岛厂房在飞机和风致飞射物撞击作用下的损伤破坏和可靠性评估也是重要的研究方向。提出核岛厂房抗大型客机撞击的结构设计方法, 并与现有抗风/震设计相协调, 为已有和新建核电站的抗撞评估与设计提供理论基础和技术支撑, 这是开展该领域研究工作根本, 然而相关研究工作还远滞后于工程建设。

#### 参考文献

- [1] GAVIN Cameron. Nuclear terrorism: reactor & radiological attacks after September 11 [M]. Vienna, Austria: Symposium on International Safeguards: Verification and Nuclear Material Security 2001.
- [2] Department of Energy. Accident analysis for aircraft crash into hazardous facilities: DOE-STD-3014-2006 [S]. Washington DC: Department of Energy, 2006.
- [3] United States Nuclear Regulatory Commission. Aircraft impact assessment: 10 CFR 50.150 [S]. Washington DC: United States Nuclear Regulatory Commission, 2006.

- 2009.
- [4] Nuclear Regulatory Commission. Consideration of aircraft impacts for new nuclear power reactors: RIN 3150-AI19 [S]. Washington DC: Nuclear Regulatory Commission, 2009.
- [5] Nuclear Energy Institute. Methodology for performing aircraft impact assessments for new plant designs: NEI 07-13 [S]. Washington DC: Nuclear Energy Institute, 2009.
- [6] Nuclear Regulatory Commission. Guidance for the assessment of beyond-design-basis aircraft impacts [S]. Washington DC: Nuclear Regulatory Commission, 2011.
- [7] 核动力厂设计安全规定: HAF 102—2016 [S]. 北京: 国家核安全局, 2016.
- [8] JIANG H, CHORZEPA M G. Aircraft impact analysis of nuclear safety-related concrete structures: a review [J]. *Engineering Failure Analysis*, 2014, 46: 118–133.
- [9] 刘晶波, 韩鹏飞, 林丽, 等. 飞机撞击建(构)筑物研究进展[J]. *爆炸与冲击*, 2016, 36(2): 269–278.
- [10] 温丽晶, 张春明, 刘海庆, 等. 飞机撞击下核电厂安全壳载荷曲线相关问题研究[J]. *安全与环境学报*, 2015, 15(6): 106–110.
- [11] CHENG S J, SUN Y G, LI X W, et al. Methodology for the analysis of large commercial aircraft impact on NPP [C]// Transactions of the 25th International Conference on Nuclear Engineering. New York, USA: American Society of Mechanical Engineers, 2017: 1–5.
- [12] KOECHLIN P, POTAPOV S. Specificity of aircraft crash compared to other missile impacts [C]// Transactions of the 16th International Conference on Nuclear Engineering. New York, USA: American Society of Mechanical Engineers, 2008: 285–291.
- [13] KOECHLIN P, POTAPOV S. Classification of soft and hard impacts: application to aircraft crash [J]. *Nuclear Engineering and Design*, 2009, 239(4): 613–618.
- [14] RIERA J D. On the stress analysis of structures subjected to aircraft impact forces [J]. *Nuclear Engineering and Design*, 1968, 8(4): 415–426.
- [15] 韩鹏飞, 刘晶波, 陆新征, 等. 飞机撞击荷载计算模型中压溃力选取分析[J]. *工程力学*, 2016, 33(2): 81–87.
- [16] 张涛. 大型商用客机对核电站安全壳撞击破坏效应的理论与数值模拟研究[D]. 南京: 解放军理工大学, 2015.
- [17] HORUYIK K. Analytic modeling of the impact of soft missiles on protective walls [C]// Transaction of the 4th International Conference on Structural Mechanics in Reactor Technology. Raleigh, NC: International Association for Structural Mechanics in Reactor Technology, 1977: 1–12.
- [18] BAHAR L Y, RICE J S. Simplified derivation of the reaction-time history in aircraft impact on a nuclear power plant [J]. *Nuclear Engineering and Design*, 1978, 49(3): 263–268.
- [19] KAR A K. Impactive effects of tornado missiles and aircraft [J]. *Journal of the Structural Division*, 1979, 105(11): 2243–2260.
- [20] RIERA J D. A critical reappraisal of nuclear power plant safety against accidental aircraft impact [J]. *Nuclear Engineering and Design*, 1980, 57(1): 193–206.
- [21] SUGANO T, TSUBOTA H, KASAI Y, et al. Full-scale aircraft impact test for evaluation of impact force [J]. *Nuclear Engineering and Design*, 1993, 140(3): 373–385.
- [22] 张超. 飞机碰撞混凝土靶的冲击载荷解析研究[D]. 北京: 北京理工大学, 2015.
- [23] DRITTLER K, GRUNER P. Calculation of the total force acting upon a rigid wall by projectiles [J]. *Nuclear Engineering and Design*, 1976, 37(2): 231–244.
- [24] DRITTLER K, GRUNER P. The force resulting from impact of fast-flying military aircraft upon a rigid wall [J]. *Nuclear Engineering and Design*, 1976, 37(2): 245–248.
- [25] WOLF J P, BUCHER K M, SKRIKERUD P E. Response of equipment to aircraft impact [J]. *Nuclear Engineering and Design*, 1978, 47(1): 169–193.
- [26] ZORN N F, SCHUELLER G I. On the failure probability of the containment under accidental aircraft impact [J]. *Nuclear Engineering and Design*, 1986, 91(3): 277–286.
- [27] VON RIESEMANN W A, PARRISH R L, BICKEL D C, et al. Full-scale aircraft impact test for evaluation of impact forces: part 1: test plan, test method, and test results [C]// Transactions of the 10th International Conference on Structural Mechanics in Reactor Technology. Raleigh, NC: International Association for Structural Mechanics in Reactor Technology, 1989: 285–292.
- [28] MUTO K, SUGANO T, TSUBOTA H, et al. Full-scale aircraft impact test for evaluation of impact forces: part 2: analysis of the results [C]// Transactions of the 10th International Conference on Structural Mechanics in Reactor Technology. Raleigh, NC: International Association for Structural Mechanics in Reactor Technology, 1989: 293–299.
- [29] WEN L J, ZHANG C M, GUO C, et al. Dynamic responses of a steel-reinforced concrete target impacted by aircraft models [J]. *International Journal of Impact Engineering*, 2018, 117: 123–137.
- [30] TSUBOTA H, KOSHIKA N, MIZUNO J, et al. Scale

- model tests of multiple barriers against aircraft impact: part 1: experimental program and test results [C]// Transactions of the 15th International Conference on Structural Mechanics in Reactor Technology. Raleigh , NC: International Association for Structural Mechanics in Reactor Technology ,1999 ,J04/2: 137-144.
- [31] MIZUNO J , KOSHIKA N , SAWAMOTO Y , et al. Investigation on impact resistance of steel plate reinforced concrete barriers against aircraft impact: part 1: test program and results [C]// Transactions of the 18th International Conference on Structural Mechanics in Reactor Technology. Raleigh , NC: International Association for Structural Mechanics in Reactor Technology ,2005 ,J05/1: 2566-2579.
- [32] ANDERSON M A H G , SAGE F , DAVIS I L , BARTLEY R , O' BRIEN T P. Reinforced concrete behaviour due to missile impact [C]// Transactions of the 4th International Conference on Structural Mechanics in Reactor Technology. Raleigh , NC: International Association for Structural Mechanics in Reactor Technology ,1977 ,J7/7: 1-10.
- [33] NACHTSHEIM W , STANGENBERG F. Interpretation of results of Meppen slab tests: comparison with parametric investigations [J]. Nuclear Engineering and Design ,1983 ,75( 2) : 283-290.
- [34] NACHTSHEIM W , STANGENBERG F. Selected results of Meppen slab tests: state of interpretation , comparison with computational investigations [ C ]// Transactions of the 7th International Conference on Structural Mechanics in Reactor Technology. Raleigh , NC: International Association for Structural Mechanics in Reactor Technology ,1983 ,J8/1: 379-386.
- [35] RÜDIGER E , RIECH H. Experimental and theoretical investigations on the impact of deformable missiles onto reinforced concrete slabs [C]// Transactions of the 7th International Conference on Structural Mechanics in Reactor Technology. Raleigh , NC: International Association for Structural Mechanics in Reactor Technology ,1983 ,J8/3: 387-394.
- [36] LASTUNEN A , HAKOLA I , JÄRVINEN E , et al. Impact test facility [ C ] // Transactions of the 19th International Conference on Structural Mechanics in Reactor Technology. Raleigh , NC: International Association for Structural Mechanics in Reactor Technology ,2007 ,J08/2: 1-8.
- [37] TARALLO F , RAMBACH J M , BOURASSEAU N , et al. VTT IMPACT program-First phase: Lessons gained by IRSN [ C ] // Transactions of the 20th International Conference on Structural Mechanics in Reactor Technology. Raleigh , NC: International Association for Structural Mechanics in Reactor Technology ,2009: Paper ID 1746.
- [38] HECKÖTTER C , SIEVERS J , TARALLO F , et al. Comparative analyses of impact tests with reinforced concrete slabs [ C ]//The EUROSAFE Forum 2010. Gürzenich Hall , Cologne: EUROSAFE Association , 2010.
- [39] TARALLO F , RAMBACH J M. Some lessons learned from tests of VTT impact program , phases I and II [ C ]// Transactions of the 22nd International Conference on Structural Mechanics in Reactor Technology. Raleigh , NC: International Association for Structural Mechanics in Reactor Technology ,2013.
- [40] BORGERHOFF M , SCHNEEBERGER C , STANGENBERG F , et al. Conclusions from combined bending and punching tests for aircraft impact design [ C ]// Transactions of the 22nd International Conference on Structural Mechanics in Reactor Technology. Raleigh , NC: International Association for Structural Mechanics in Reactor Technology , 2013: Paper ID 167.
- [41] ZINN R , BORGERHOFF M , STANGENBERG F , et al. Analysis of combined bending and punching tests of reinforced concrete slabs within IMPACT III Project [C]// Transactions of the 9th International Conference on Structural Dynamics. Porto , Portugal: European Association of Structural Dynamics ,2014: 3533-3540.
- [42] BORGERHOFF M , RODRÍGUEZ J , SCHNEEBERGER C , et al. Knowledge from further IMPACT III tests of reinforced concrete slabs in combined bending and punching [C]// Transactions of the 23rd International Conference on Structural Mechanics in Reactor Technology. Raleigh , NC: International Association for Structural Mechanics in Reactor Technology , 2015: Paper ID 771.
- [43] BORGERHOFF M , SCHNEEBERGER C , STANGENBERG F , et al. Vibration propagation and damping behaviour of reinforced concrete structures tested within IMPACT III project [C]// Transactions of the 23rd International Conference on Structural Mechanics in Reactor Technology. Raleigh , NC: International Association for Structural Mechanics in Reactor Technology ,2015: Paper ID 773.
- [44] VEPSÄ A , AATOLA S , CALONIUS K , et al. Impact testing of a wall-floor-floor reinforced concrete structure [ C ]// Transactions of the 23rd International Conference on Structural Mechanics in Reactor Technology. Raleigh , NC: International Association for Structural Mechanics in Reactor Technology , 2015: Paper ID 337.
- [45] VEPSÄ A , CALONIUS K , SAARENHEIMO A , et al. Soft impact testing of a wall-floor-wall reinforced concrete structure [ J ]. Nuclear Engineering and Design ,2017 ,311: 86-103.



- [46] Nuclear Energy Agency. Improving robustness assessment methodologies for structures impacted by missiles (IRIS\_2010) final report[R]. Paris, France: Nuclear Agency, 2011.
- [47] RAMBACH J M, ORBOVIC N, TARALLO F. IRIS\_2010 part I: general overview of the benchmark[C]// Transactions of the 21st International Conference on Structural Mechanics in Reactor Technology. Raleigh, NC: International Association for Structural Mechanics in Reactor Technology, 2011.
- [48] VEPSÄ A, SAARENHEIMO A, TARALLO F, et al. IRIS\_2010 part II: experimental data [C]// Transactions of the 21st International Conference on Structural Mechanics in Reactor Technology. Raleigh, NC: International Association for Structural Mechanics in Reactor Technology, 2011: Paper ID 520.
- [49] ORBOVIC N, BENBOUDJEMA F, BERTHAUD Y, et al. IRIS\_2010 part III: numerical simulations of MEPPEN II-4 test and VTT-IRSN-CNCS punching tests [C]// Transactions of the 21st International Conference on Structural Mechanics in Reactor Technology. Raleigh, NC: International Association for Structural Mechanics in Reactor Technology, 2011: Paper ID 163.
- [50] BERTHAUD Y, BENBOUDJEMA F, COLLIAT J B, et al. IRIS\_2010 part IV: numerical simulations of flexural VTT-IRSN tests[C]// Transactions of the 21st International Conference on Structural Mechanics in Reactor Technology. Raleigh, NC: International Association for Structural Mechanics in Reactor Technology, 2011: Paper ID 197.
- [51] TARALLO F, RAMBACH J M, ORBOVIC N. IRIS\_2010 part V: lessons learned, recommendations and tracks for future works [C]// Transactions of the 21st International Conference on Structural Mechanics in Reactor Technology. Raleigh, NC: International Association for Structural Mechanics in Reactor Technology, 2011: Paper ID 145.
- [52] Nuclear Energy Agency. Improving robustness assessment methodologies for structures impacted by missiles (IRIS\_2012) final report [R]. No. NEA-CSNI-R-2014-5. Paris, France: Organisation for Economic Co-Operation and Development, 2014.
- [53] ORBOVIC N, TARALLO F, RAMBACH J M, et al. IRIS\_2012 benchmark part I: overview and summary of the results [C]// Transactions of the 22nd International Conference on Structural Mechanics in Reactor Technology. Raleigh, NC: International Association for Structural Mechanics in Reactor Technology, 2013: Paper ID 652.
- [54] TARALLO F, ORBOVIC N, RAMBACH J M, et al. IRIS\_2012 benchmark part II: lessons learned and recommendations [C]// Transactions of the 22nd International Conference on Structural Mechanics in Reactor Technology. Raleigh, NC: International Association for Structural Mechanics in Reactor Technology, 2013: Paper ID 204.
- [55] HERVÉ G, GALAN M, DARRABA A. IRIS phase 3: description of IRIS phase 3 project [R]. Paris: Electric De France, 2017.
- [56] 孔建伟, 刘君. CPR1000 核电站安全壳撞击试验研究[J]. 工业建筑, 2017, 47(1): 21-26.
- [57] ITOH M, KATAYAMA M, RAINSBERGER R. Computer simulation of a Boeing 747 passenger jet crashing into a reinforced concrete wall [J]. Materials Science Forum, 2004, 465/466: 73-78.
- [58] ITOH M, KATAYAMA M, RAINSBERGER R. Computer simulation of an F-4 Phantom crashing into a reinforced concrete wall [J]. Computational Ballistics II 2005, 40: 207-217.
- [59] MARTIN O, CENTRO V, SCHWOERTZIG T. Finite element analysis on the Meppen-II-4 slab test [J]. Nuclear Engineering and Design, 2012, 247(6): 1-10.
- [60] SADIQ M, ZHU XY, PAN R. Simulation analysis of impact tests of steel plate reinforced concrete and reinforced concrete slabs against aircraft impact and its validation with experimental results [J]. Nuclear Engineering and Design, 2014, 273: 653-667.
- [61] THAI D K, KIM S E. Failure analysis of reinforced concrete walls under impact loading using the finite element approach [J]. Engineering Failure Analysis, 2014, 45(1): 252-277.
- [62] 李小军, 侯春林. 飞机撞击混凝土结构的动力学分析[J]. 爆炸与冲击, 2015, 35(2): 215-221.
- [63] HECKÖTTER C, VEPSÄ A. Experimental investigation and numerical analyses of reinforced concrete structures subjected to external missile impact [J]. Progress in Nuclear Energy, 2015, 84(6): 56-67.
- [64] LEE H K, KIM S E. Comparative assessment of impact resistance of SC and RC panels using finite element analysis [J]. Progress in Nuclear Energy, 2016, 90: 105-121.
- [65] 左家红. 秦山核电站安全壳在飞机撞击下的非线性分析[J]. 核科学与工程, 1992, 12(1): 35-42.
- [66] KUKREJA M. Damage evaluation of 500 MWe Indian Pressurized Heavy Water Reactor nuclear containment for aircraft impact [J]. Nuclear Engineering and Design, 2005, 235(17/18/19): 1807-1817.
- [67] 王晓雯, 王明弹, 夏祖训. 先进半球顶安全壳在飞机撞击下的动态响应分析 [C]// 第 15 届全国反应堆结构力学大会. 北京: 中国力学学会反应堆力学委员会, 2008.
- [68] FRANO R L, FORASASSI G. Preliminary evaluation of aircraft impact on a near term nuclear power plant [J].

- Nuclear Engineering and Design, 2011, 241 ( 12 ): 5245-5250.
- [69] IQBAL M A, RAI S, SADIQUE M R, et al. Numerical simulation of aircraft crash on nuclear containment structure [J]. Nuclear Engineering and Design, 2012, 243: 321-335.
- [70] SADIQUE M R, IQBAL M A, BHARGAVA P. Nuclear containment structure subjected to commercial and fighter aircraft crash [J]. Nuclear Engineering and Design, 2013, 260: 30-46.
- [71] 李亮, 潘蓉, 朱秀云. 飞机撞击反应堆安全壳的有限元分析 [J]. 电力建设, 2013, 34( 8 ): 77-80.
- [72] IQBAL M A, SADIQUE M R, BHARGAVA P, et al. Damage assessment of nuclear containment against aircraft crash [J]. Nuclear Engineering and Design, 2014, 278( 8 ): 586-600.
- [73] 朱秀云, 潘蓉, 林皋, 等. 基于荷载时程分析法的商用飞机撞击钢板混凝土结构安全壳的有限元分析 [J]. 振动与冲击, 2015, 34( 1 ): 1-5.
- [74] ROUZAUD C, GATUINGT F, HERVÉ G, et al. Influence of the aircraft crash induced local nonlinearities on the overall dynamic response of a RC structure through a parametric study [J]. Nuclear Engineering and Design, 2016, 298: 168-182.
- [75] ANDONOV A, KOSTOV M, ILIEV A. Capacity assessment of concrete containment vessels subjected to aircraft impact [J]. Nuclear Engineering and Design, 2015, 295: 767-781.
- [76] 李亮, 潘蓉, 朱秀云, 等. 基于荷载时程分析法的飞机撞击反应堆安全壳的对比研究 [J]. 工业建筑, 2015, 45( 9 ): 17-21.
- [77] 徐征宇. 飞机撞击核岛屏蔽厂房的有限元分析 [J]. 核科学与工程, 2010, 30( 增刊 1 ): 309-313.
- [78] 郑文凯. 大型商用飞机撞击核电站屏蔽厂房的荷载研究 [D]. 北京: 清华大学, 2013.
- [79] 刘晶波, 郑文凯. 大型商用飞机撞击核电站屏蔽厂房荷载研究 [J]. 振动与冲击, 2014, 33( 6 ): 97-101.
- [80] 汤胜文. 核电站外安全壳冲击荷载与冲击响应研究 [D]. 哈尔滨: 哈尔滨工业大学, 2014.
- [81] 周妙莹. 冲击荷载作用下安全壳的破坏机理研究 [D]. 哈尔滨: 哈尔滨工业大学, 2014.
- [82] 程书剑. AP1000 钢板混凝土屏蔽厂房抗大型商用飞机撞击分析 [J]. 核电工程与技术, 2014, 27( 1 ): 41-48.
- [83] 程书剑, 王晓雯, 葛鸿辉, 等. AP1000 钢筋混凝土屏蔽厂房抗大型商用飞机撞击分析 [J]. 核动力工程, 2015, 36( 5 ): 140-143.
- [84] 林丽, 陆新征, 韩鹏飞, 等. 大型商用飞机撞击刚性墙及核电屏蔽厂房的撞击力分析 [J]. 振动与冲击, 2015, 34( 9 ): 158-163.
- [85] LU X Z, LIN K, CEN S, et al. Comparing different fidelity models for the impact analysis of large commercial aircrafts on a containment building [J]. Engineering Failure Analysis, 2015, 57: 254-269.
- [86] 吴婧姝, 张兴斌, 潘蓉. 大型商用飞机撞击核安全壳破坏效应的数值模拟 [J]. 工业建筑, 2016, 46( 10 ): 28-32.
- [87] 刘晶波, 韩鹏飞, 郑文凯, 等. 商用飞机撞击核电站屏蔽厂房数值模拟 [J]. 爆炸与冲击, 2016, 36( 3 ): 391-399.
- [88] JEON S J, JIN B M. Improvement of impact-resistance of a nuclear containment building using fiber reinforced concrete [J]. Nuclear Engineering and Design, 2016, 304: 139-150.
- [89] LEE K, HAN S E, HONG J W. Analysis of impact of large commercial aircraft on a prestressed containment building [J]. Nuclear Engineering and Design, 2013, 265: 431-449.
- [90] ZHANG T, WU H, FANG Q, GONG Z M. Influences of nuclear containment radius on the aircraft impact force based on the Riera function [J]. Nuclear Engineering and Design, 2015, 293: 196-204.
- [91] ZHANG T, WU H, FANG Q, HUANG T. Numerical simulations of nuclear power plant containment subjected to aircraft impact [J]. Nuclear Engineering and Design, 2017, 320: 207-221.
- [92] 曹健伟, 方秦, 龚自明, 等. 商用客机对核安全壳撞击破坏效应的数值模拟分析 [J]. 工程力学, 2014, 31( 9 ): 63-70.
- [93] 张涛, 方秦, 吴昊, 等. 飞机对核安全壳撞击破坏效应的数值模拟 [J]. 解放军理工大学学报( 自然科学版 ), 2014, 15( 4 ): 335-340.
- [94] 张涛, 方秦, 吴昊, 等. 飞机撞击核安全壳不同位置破坏效应的数值模拟 [J]. 应用数学和力学, 2015, 36( 增刊 ): 107-116.
- [95] 张涛, 吴昊, 方秦, 等. 钢束预应力对飞机撞击核安全壳破坏效应的影响 [J]. 北京理工大学学报, 2016, 36( 增刊 1 ): 19-22.
- [96] ARROS J, DOUMBALSKI N. Analysis of aircraft impact to concrete structures [J]. Nuclear Engineering and Design, 2007, 237( 12/13 ): 1241-1249.
- [97] DUNDULIS G, KULAK R F, MARCHERTAS A, et al. Structural integrity analysis of an Ignalina nuclear power plant building subjected to an airplane crash [J]. Nuclear Engineering and Design, 2007, 237( 14 ): 1503-1512.
- [98] THAI D K, KIM S E, LEE H K. Effects of reinforcement ratio and arrangement on the structural behavior of a nuclear building under aircraft impact [J]. Nuclear Engineering and Design, 2014, 276( 3 ): 228-240.
- [99] LI Y, LIN F, GU X, et al. Numerical research of a super-large cooling tower subjected to accidental loads [J]. Nuclear Engineering and Design, 2014, 269( 4 ): 1000-1010.

- 184-192.
- [100] THAI D K , KIM S E. Safety assessment of a nuclear power plant building subjected to an aircraft crash [J]. Nuclear Engineering and Design ,2015 ,293: 38-52.
- [101] SHIN S S , HAHM D , PARK T. Shock vibration and damage responses of primary auxiliary buildings from aircraft impact [J]. Nuclear Engineering and Design , 2016 ,310: 57-68.
- [102] FRANO R L , STEFANINI L. Investigation of the behaviour of a LILW superficial repository under aircraft impact [J]. Nuclear Engineering and Design , 2016 , 300: 552-562.
- [103] FANG Q , WU H. Concrete structures under projectile impact [M]. Berlin , Germany: Springer Press ,2017.
- [104] SUGANO T , TSUBOTA H , KASAI Y , et al. Local damage to reinforced concrete structures caused by impact of aircraft engine missiles: part 1: test program , method and results [J]. Nuclear Engineering and Design ,1993 ,140( 3) : 387-405.
- [105] SUGANO T , TSUBOTA H , KASAI Y , et al. Local damage to reinforced concrete structures caused by impact of aircraft engine missiles: part 2: evaluation of test results [J]. Nuclear Engineering and Design , 1993 ,140( 3) : 407-423.
- [106] MUTO K , TACHIKAWA H , SUGANO T , et al. Experimental studies on local damage of reinforced concrete structures by the impact of deformable missiles: part 1: outline of test program and small-scale tests [C]// Transactions of the 10th International Conference on Structural Mechanics in Reactor Technology. Raleigh ,NC: International Association for Structural Mechanics in Reactor Technology , 1989: 257-264.
- [107] ESASHI Y , OHNUMA H , ITO C. Experimental studies on local damage of reinforced concrete structures by the impact of deformable missiles: part 2: intermediate scale tests [C]// Transactions of the 10th International Conference on Structural Mechanics in Reactor Technology. Raleigh ,NC: International Association for Structural Mechanics in Reactor Technology , 1989: 265-270.
- [108] MUTO K , SUGANO T , TSUBOTA H , et al. Experimental studies on local damage of reinforced concrete structures by the impact of deformable missiles: part 3: full scale tests [C]// Transactions of the 10th International Conference on Structural Mechanics in Reactor Technology. Raleigh , NC: International Association for Structural Mechanics in Reactor Technology ,1989: 271-278.
- [109] MUTO K , SUGANO T , TSUBOTA H , et al. Experimental studies on local damage of reinforced concrete structures by the impact of deformable missiles: part 4: overall evaluation of local damage [C]// Transactions of the 10th International Conference on Structural Mechanics in Reactor Technology. Raleigh ,NC: International Association for Structural Mechanics in Reactor Technology , 1989: 279-284.
- [110] RIEDEL W , NÖLDGEN M , STRABBURGER E , et al. Local damage to ultra high performance concrete structures caused by an impact of aircraft engine missiles [J]. Nuclear Engineering and Design , 2010 , 240: 2633-2642.
- [111] ZHANG T , WU H , FANG Q , HUANG T , GONG Z M , PENG Y. UHP-SFRC panels subjected to aircraft engine impact: experiment and numerical simulation [J]. International Journal of Impact Engineering , 2017 ,109: 276-292.
- [112] ZHANG T , WU H , ZHANG F J , FANG Q , Huang T. Ballistic limit of aircraft engine missile impact on ultra-high-performance steel-fiber-reinforced concrete panels [J]. International Journal of Protective Structures , 2017 ,8( 4) : 503-523
- [113] ZHANG T , WU H , HUANG T , SHENG J H , FANG Q , ZHANG F J. Penetration depth of RC panels subjected to the impact of aircraft engine missiles [J]. Nuclear Engineering and Design ,2018 ,335: 44-53
- [114] SAWAMOTO Y , TSUBOTA H , KASAI Y , et al. Analytical studies on local damage to reinforced concrete structures under impact loading by discrete element method [J]. Nuclear Engineering and Design , 1998 ,179( 2) : 157-177.
- [115] THAI D K , KIM S E. Prediction of UHPFRC panels thickness subjected to aircraft engine impact [J]. Case Studies in Structural Engineering ,2016 ,5: 38-53.
- [116] ALMOMANI B , LEE S , KANG H G. Structural analysis of a metal spent-fuel storage cask in an aircraft crash for risk assessment [J]. Nuclear Engineering and Design , 2016 ,308: 60-72.
- [117] PETRANGELI G. Large airplane crash on a nuclear plant: design study against excessive shaking of components [J]. Nuclear Engineering and Design , 2010 ,240( 12) : 4037-4042.
- [118] LIN F , TANG H. Nuclear containment structure subjected to commercial aircraft crash and subsequent vibrations and fire [J]. Nuclear Engineering and Design ,2017 ,322: 68-80.
- [119] SIDDIQI N A , IQBAL M A , ABBAS H , et al. Reliability analysis of nuclear containment without metallic liners against jet aircraft crash [J]. Nuclear Engineering and Design ,2003 ,224( 1) : 11-21.
- [120] ABBAS H , PAUL D K , GODBOLE P N , et al. Aircraft crash upon outer containment of nuclear power plant [J]. Nuclear Engineering and Design ,1996 ,160( 1/



- 2) : 13-50.
- [121] TENNANT D , LEVINE H , MOULD J , et al. Rapid evaluation of buildings and infrastructure to accidental and deliberate aircraft impact [J]. Nuclear Engineering and Design ,2014 ,269( 6) : 142-148.
- [122] KOSTOV M , HENKEL F O , ANDONOV A. Safety assessment of A92 reactor building for large commercial aircraft crash [J]. Nuclear Engineering and Design , 2014 ,269( 4) : 262-267.
- [123] MURRAY Y D. Users manual for LS-DYNA concrete material model 159: FHWA-HRT-05-062 [ R ]. Mclean , VA: Federal Highway Administration ,2007.
- [124] MURRAY Y D , ABU-ODEH A Y , BLIGH R P. Evaluation of LS-DYNA concrete material model 159: FHWA-HRT-05-063 [ R ]. Mclean , VA: Federal Highway Administration ,2007.
- [125] SCHWER L. An introduction to the Winfrith concrete model [R]. [S.l. : s. n. ],2010.
- [126] PETRY L. Monographies de Systemes d' Artillerie [M]. Brussels [s. n. ],1910.
- [127] SAMUELY F J , HAMANN C W. Civil protection [M]. [S.l. ]: The Architectural Press ,1939.
- [128] BETH R A. Penetration of projectiles in concrete: PPAB Interim Report No. 3 [R]. [S.l. : s. n. ],1941.
- [129] CHELAPATI C V , KENNEDY R P , WALL I B. Probabilistic assessment of hazard for nuclear structures [J]. Nuclear Engineering and Design ,1972 ,19: 333-364.
- [130] GWALTNEY R C. Missile generation and protection in light water-cooled reactor power plants: ORNL NSIC-22 [R]. Oak Ridge ,TN: Oak Ridge National Laboratory , 1968.
- [131] ADELI H , AMIN A M. Local effects of impactors on concrete structures [ J ]. Nuclear Engineering and Design ,1985 ,88( 3) : 301-317.
- [132] WHIFFEN P. UK Road Research Laboratory Note No. MOS/311 [R]. [S.l. : s. n. ],1943.
- [133] HALDAR A , HAMIEH H. Local effect of solid missiles on concrete structures [ J ]. Journal of Structural Engineering 1984 ,110( 5) : 948-960.
- [134] NDRC. Effects of impact and explosion: summary technical report of division 2 [R]. Washington DC: National Defence Research Committee ,1946.
- [135] KENNEDY R P. Effects of an aircraft crash into a concrete reactor containment building [M]. Anaheim , CA: Holmes & Narver Inc ,1966.
- [136] WILLE K , NAAMAN A E. Pullout behavior of high-strength steel fibers embedded in ultra-high-performance concrete [J]. ACI Materials Journal ,2012 ,109( 4) : 479-488.
- [137] LI Q M , TONG D J. Perforation thickness and ballistic limit of concrete target subjected to rigid projectile impact [J]. Journal of Engineering Mechanics ,2003 ,129( 9) : 1083-1091.
- [138] LI Q M , REID S R , WEN H M , TELFORD A R. Local impact effects of hard missiles on concrete targets [J]. International Journal of Impact Engineering , 2005 ,32( 1) : 224-284.
- [139] GRISARO H , DANCYGIER A N. A modified energy method to assess the residual velocity of non-deforming projectiles that perforate concrete barriers [ J ]. International Journal of Protective Structures ,2014 ,5( 3) : 307-321.
